# Supplementary material for: 2-Phenylbenzothiazole conjugated with cyclopentadienyl tricarbonyl [CpM(CO)3] (M = Re,99mTc) complexes as potential imaging probes for β-amyloid plaques
Source: Royal Society of Chemistry journal article supplement (doi:10.1039/c5dt00023h), 2015-01-01
Supplement: c5dt00023h1.pdf [file c5dt00023h1.pdf]

### Supporting Information

## 2-Phenylbenzothiazole Conjugated with Cyclopentadienyl Tricarbonyl [CpM(CO)<sub>3</sub>] (M = Re, <sup>99m</sup>Tc) Complexes as Potential Imaging Probes for β-Amyloid Plaques

*Jianhua Jia<sup>†</sup>, Mengchao Cui<sup>\*†</sup>, Jiapei Dai<sup>‡</sup>, Boli Liu<sup>†</sup>*

#### Contents:

1. Purity and retention time of key target compounds
2. *In vitro* autoradiography on brain sections of normal mice for complexes [<sup>99m</sup>Tc]**20** – **23**
3. *In vitro* autoradiography on brain section of AD patient for complex [<sup>99m</sup>Tc]**22**
4. Biodistribution experiments of complexes [<sup>99m</sup>Tc]**20** – **23**
5. The absorption and fluorescence spectra of rhenium complexes **20** – **23**
6. Crystal data
7. <sup>1</sup>H-NMR, <sup>13</sup>C-NMR, MS and HRMS data of synthesized compounds

1. Purity and retention time of key target compounds

**Table S1.** Purity and retention time of key target compounds

| <b>Compd</b>                | <b>Flow rate<br/>(mL/min)</b> | <b>Mobile phase<br/>(ACN%)</b> | <b>Agela<br/>Technologies,<br/>5 <math>\mu</math>m</b> | <b>Retention<br/>time (RT,<br/>min)</b> | <b>Purity<br/>(%)</b> |
|-----------------------------|-------------------------------|--------------------------------|--------------------------------------------------------|-----------------------------------------|-----------------------|
| <b>20</b>                   | 1                             | 80                             | 4.6 $\times$ 250 mm                                    | 8.07                                    | 98.22                 |
| <b>[<sup>99m</sup>Tc]20</b> | 1                             | 80                             | 4.6 $\times$ 250 mm                                    | 9.08                                    | 99.75                 |
| <b>21</b>                   | 1                             | 80                             | 4.6 $\times$ 250 mm                                    | 10.09                                   | 90.48                 |
| <b>[<sup>99m</sup>Tc]21</b> | 1                             | 80                             | 4.6 $\times$ 250 mm                                    | 11.50                                   | 99.27                 |
| <b>22</b>                   | 1                             | 80                             | 4.6 $\times$ 250 mm                                    | 12.09                                   | 98.26                 |
| <b>[<sup>99m</sup>Tc]22</b> | 1                             | 80                             | 4.6 $\times$ 250 mm                                    | 13.45                                   | 99.43                 |
| <b>23</b>                   | 1                             | 80                             | 4.6 $\times$ 250 mm                                    | 12.96                                   | 97.55                 |
| <b>[<sup>99m</sup>Tc]23</b> | 1                             | 80                             | 4.6 $\times$ 250 mm                                    | 14.47                                   | 98.03                 |

2. *In vitro* autoradiography on brain sections of normal mice for complexes [<sup>99m</sup>Tc]20 -

23

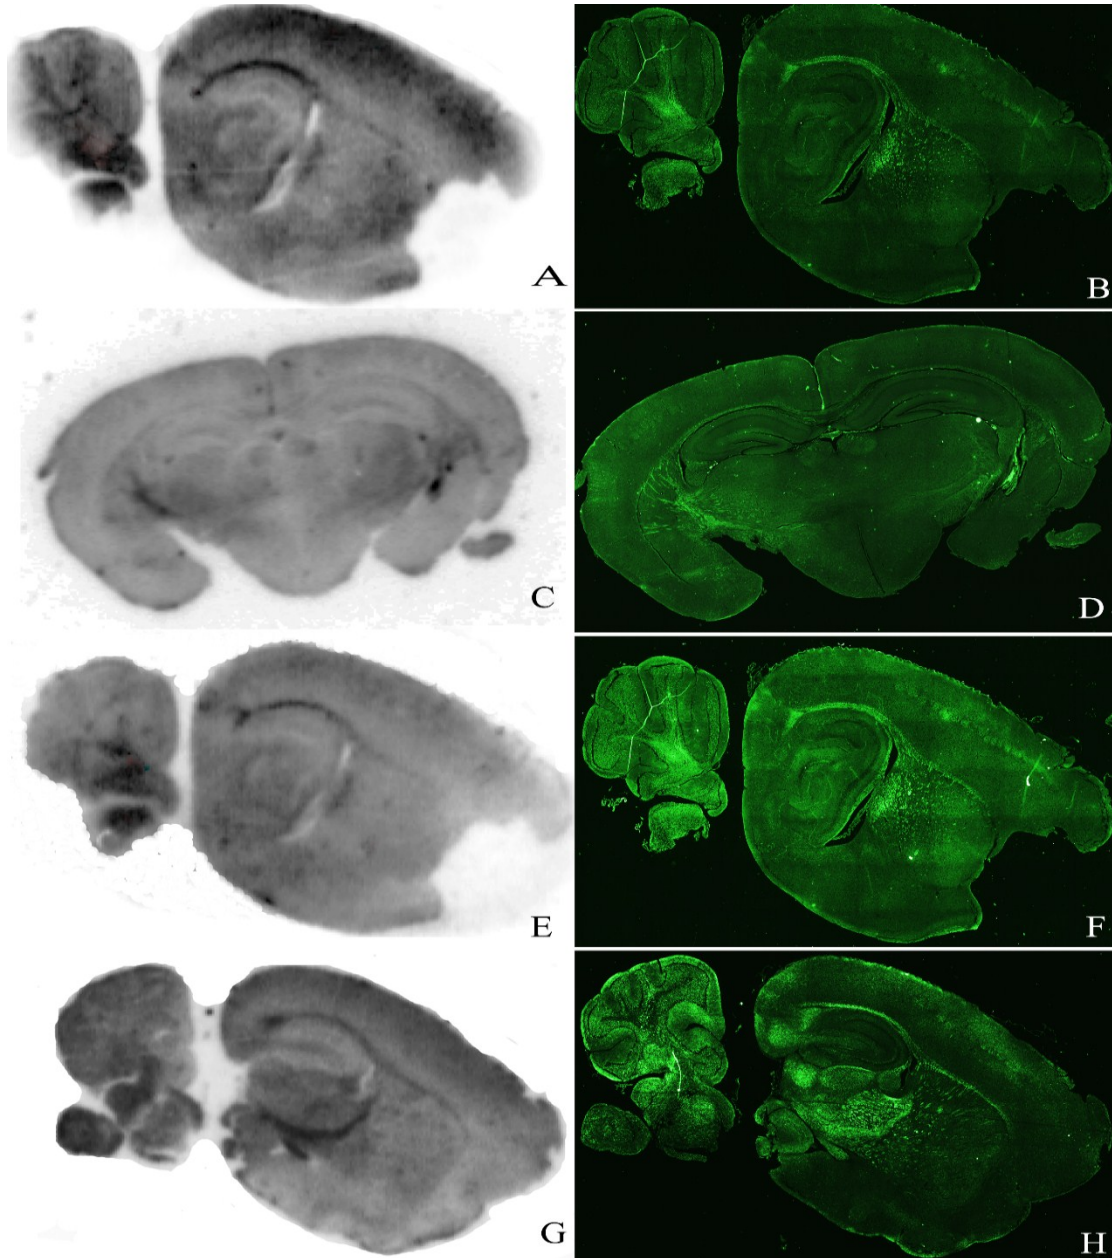

**Figure S1.** *In vitro* autoradiography of [<sup>99m</sup>Tc]20 (A), [<sup>99m</sup>Tc]21 (C), [<sup>99m</sup>Tc]22 (E) and [<sup>99m</sup>Tc]23 (G) on brain sections of wild-type (C57BL6, 12-month-old, female). The same sections were confirmed by fluorescence staining using Thioflavin-S (B, D, F and H).

3. *In vitro* autoradiography on brain sections of AD patient for complex [<sup>99m</sup>Tc]22

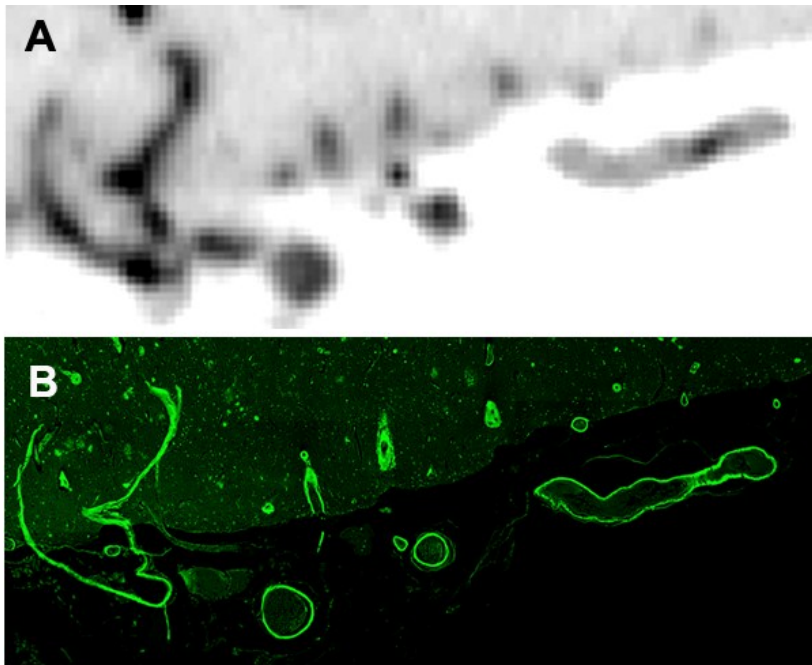

**Figure S2.** *In vitro* autoradiography of [<sup>99m</sup>Tc]22 (A) on brain sections of an AD patient (68-year-old, female, frontal lobe). The presence and distribution of cerebrovascular amyloids in the section were confirmed by fluorescence staining using Thioflavin-S (B).

4. Biodistribution experiments with normal mice of [<sup>99m</sup>Tc]20 - 23<sup>a</sup>

**Table S2.** Biodistribution in normal mice (ICR, 5 weeks, 22 - 25 g, male) after i.v. injection of [<sup>99m</sup>Tc]20 - 23<sup>a</sup>

| Organ                       | 2 min         | 10 min        | 30 min        | 60 min        |
|-----------------------------|---------------|---------------|---------------|---------------|
| <b>[<sup>99m</sup>Tc]20</b> |               |               |               |               |
| Blood                       | 2.96 ± 0.85   | 1.20 ± 0.17   | 0.66 ± 0.16   | 0.56 ± 0.12   |
| Brain                       | 0.50 ± 0.10   | 0.48 ± 0.09   | 0.28 ± 0.10   | 0.18 ± 0.07   |
| Heart                       | 10.03 ± 2.11  | 5.41 ± 0.83   | 2.30 ± 0.68   | 1.07 ± 0.36   |
| Liver                       | 33.61 ± 2.77  | 47.37 ± 5.54  | 45.58 ± 11.16 | 40.37 ± 7.78  |
| Spleen                      | 11.00 ± 2.56  | 11.52 ± 1.69  | 4.86 ± 0.60   | 2.44 ± 0.56   |
| Lung                        | 65.84 ± 12.78 | 53.52 ± 13.83 | 27.78 ± 5.78  | 15.58 ± 4.73  |
| Kidney                      | 9.38 ± 1.01   | 9.08 ± 0.96   | 5.84 ± 1.33   | 4.04 ± 0.64   |
| Pancreas                    | 2.27 ± 0.96   | 2.74 ± 0.43   | 1.31 ± 0.33   | 0.76 ± 0.22   |
| muscle                      | 1.52 ± 0.21   | 0.38 ± 0.03   | 0.26 ± 0.06   | 0.19 ± 0.04   |
| Stomach <sup>b</sup>        | 0.63 ± 0.09   | 1.42 ± 0.76   | 3.04 ± 1.99   | 4.75 ± 3.20   |
| Intestine <sup>b</sup>      | 2.26 ± 0.12   | 26.51 ± 2.93  | 49.06 ± 3.41  | 48.62 ± 5.09  |
| <b>[<sup>99m</sup>Tc]21</b> |               |               |               |               |
| Blood                       | 5.84 ± 0.75   | 2.19 ± 0.63   | 1.23 ± 0.27   | 0.76 ± 0.10   |
| Brain                       | 0.36 ± 0.07   | 0.34 ± 0.10   | 0.29 ± 0.08   | 0.19 ± 0.02   |
| Heart                       | 17.65 ± 3.20  | 15.15 ± 2.76  | 5.78 ± 1.07   | 2.42 ± 0.49   |
| Liver                       | 53.56 ± 6.60  | 70.67 ± 10.20 | 67.61 ± 15.64 | 53.02 ± 10.28 |
| Spleen                      | 13.68 ± 2.91  | 13.85 ± 3.39  | 10.82 ± 2.84  | 2.21 ± 0.17   |
| Lung                        | 14.39 ± 3.40  | 6.30 ± 0.77   | 3.42 ± 1.14   | 1.41 ± 0.24   |
| Kidney                      | 13.04 ± 1.85  | 10.94 ± 1.61  | 6.36 ± 1.01   | 3.52 ± 0.46   |
| Pancreas                    | 4.21 ± 0.63   | 3.53 ± 1.08   | 2.41 ± 0.68   | 1.17 ± 0.32   |
| muscle                      | 2.81 ± 0.36   | 2.93 ± 0.61   | 1.79 ± 0.45   | 1.20 ± 0.21   |
| Stomach <sup>b</sup>        | 0.88 ± 0.19   | 1.40 ± 0.30   | 1.66 ± 0.28   | 1.52 ± 0.43   |
| Intestine <sup>b</sup>      | 3.55 ± 0.47   | 6.18 ± 1.63   | 11.02 ± 1.24  | 12.29 ± 2.57  |
| <b>[<sup>99m</sup>Tc]22</b> |               |               |               |               |
| Blood                       | 3.28 ± 0.28   | 0.75 ± 0.08   | 0.54 ± 0.06   | 0.51 ± 0.07   |
| Brain                       | 0.26 ± 0.04   | 0.17 ± 0.02   | 0.15 ± 0.01   | 0.11 ± 0.02   |
| Heart                       | 14.96 ± 2.51  | 5.16 ± 0.77   | 2.15 ± 0.32   | 1.19 ± 0.11   |
| Liver                       | 46.18 ± 3.47  | 40.82 ± 6.26  | 48.37 ± 4.19  | 53.51 ± 2.41  |

|                             |              |              |              |              |
|-----------------------------|--------------|--------------|--------------|--------------|
| Spleen                      | 10.79 ± 2.00 | 3.02 ± 0.37  | 1.68 ± 0.21  | 1.23 ± 0.37  |
| Lung                        | 11.96 ± 2.73 | 2.22 ± 0.50  | 1.10 ± 0.22  | 0.85 ± 0.06  |
| Kidney                      | 14.46 ± 2.34 | 8.74 ± 1.41  | 4.78 ± 0.57  | 3.78 ± 0.41  |
| Pancreas                    | 3.99 ± 0.67  | 2.20 ± 0.28  | 0.95 ± 0.45  | 0.69 ± 0.09  |
| muscle                      | 2.76 ± 0.37  | 1.61 ± 0.19  | 1.18 ± 0.22  | 1.03 ± 0.15  |
| Stomach <sup>b</sup>        | 0.81 ± 0.12  | 0.73 ± 0.14  | 0.90 ± 0.09  | 1.46 ± 0.27  |
| Intestine <sup>b</sup>      | 3.69 ± 0.43  | 5.06 ± 1.19  | 11.61 ± 1.54 | 19.80 ± 2.37 |
| <b>[<sup>99m</sup>Tc]23</b> |              |              |              |              |
| Blood                       | 9.56 ± 1.52  | 1.27 ± 0.14  | 0.68 ± 0.28  | 1.00 ± 0.12  |
| Brain                       | 0.37 ± 0.08  | 0.12 ± 0.01  | 0.11 ± 0.02  | 0.14 ± 0.03  |
| Heart                       | 19.25 ± 3.91 | 11.98 ± 1.72 | 6.80 ± 1.38  | 4.68 ± 0.73  |
| Liver                       | 53.74 ± 6.25 | 59.09 ± 7.59 | 57.52 ± 8.62 | 73.62 ± 6.65 |
| Spleen                      | 15.62 ± 2.57 | 5.90 ± 0.72  | 3.22 ± 0.60  | 2.20 ± 0.37  |
| Lung                        | 28.30 ± 5.09 | 4.35 ± 0.76  | 1.94 ± 0.24  | 1.74 ± 0.25  |
| Kidney                      | 17.79 ± 3.07 | 11.86 ± 1.33 | 7.29 ± 2.06  | 5.91 ± 0.96  |
| Pancreas                    | 3.25 ± 0.49  | 2.77 ± 0.57  | 1.57 ± 0.56  | 1.43 ± 0.18  |
| muscle                      | 2.78 ± 0.81  | 2.16 ± 0.33  | 1.76 ± 0.29  | 1.70 ± 0.30  |
| Stomach <sup>b</sup>        | 1.26 ± 0.41  | 1.56 ± 0.39  | 2.01 ± 0.32  | 3.20 ± 0.83  |
| Intestine <sup>b</sup>      | 4.26 ± 0.63  | 5.59 ± 0.64  | 10.02 ± 2.92 | 23.38 ± 5.44 |

<sup>a</sup> Expressed as % injected dose per gram. Average for 5 mice ± standard deviation.

<sup>b</sup> Expressed as % injected dose per organ.

5. The absorption and fluorescence spectra of rhenium complexes **20** - **23**

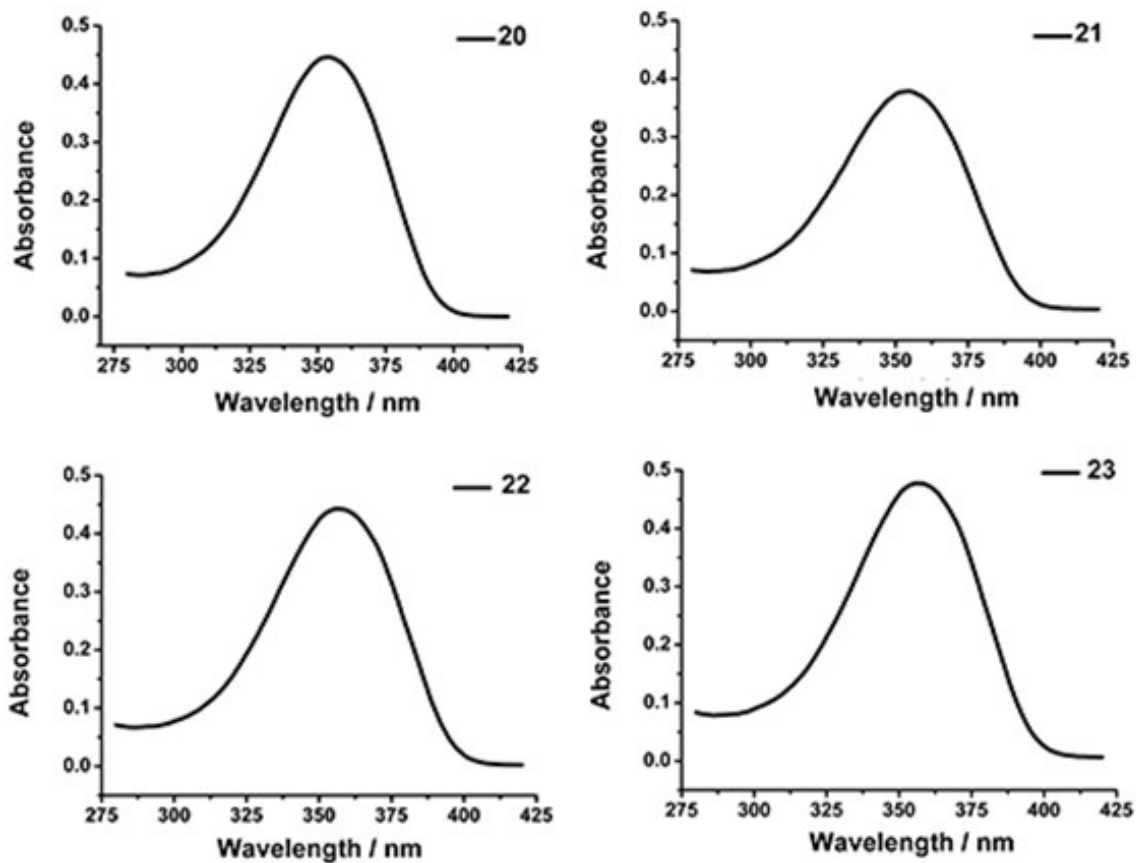

**Figure S3.** Absorption spectra of rhenium complexes **20** -**23** ( $10 \mu\text{M}$ ) in ethanol.

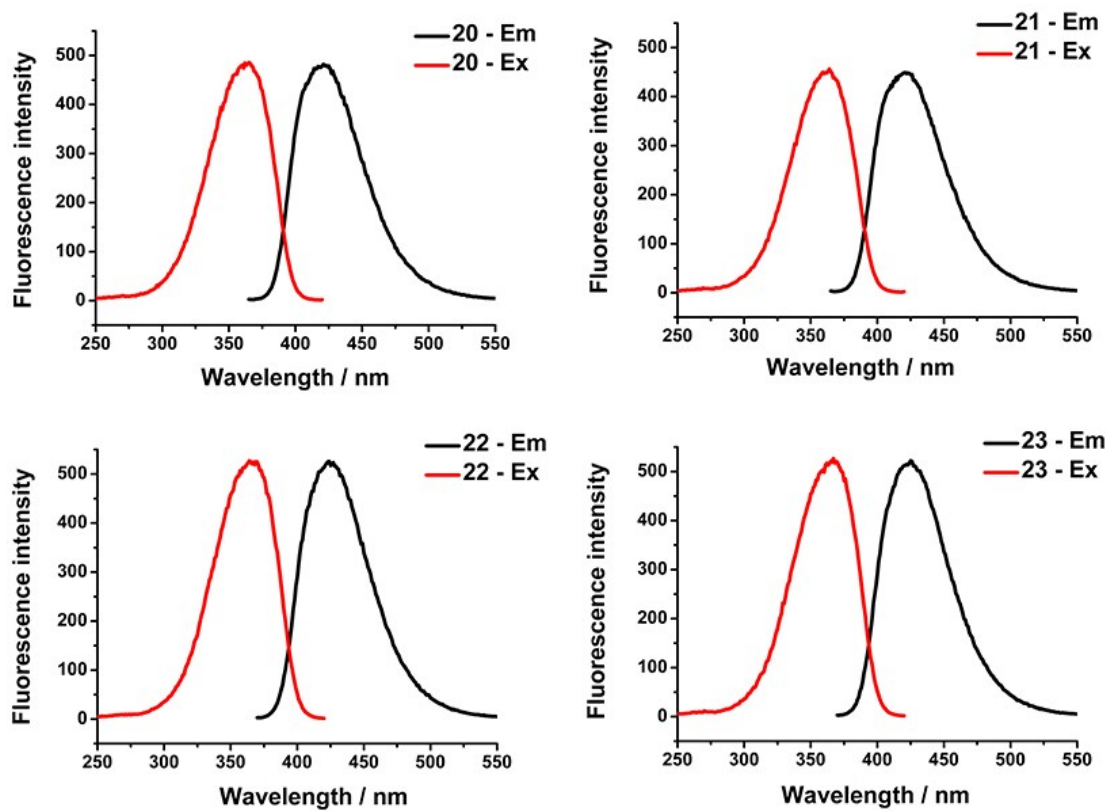

**Figure S4.** The excitation and emission spectra of rhenium complexes **20 -23** ( $10 \mu\text{M}$ ) in ethanol.



## 6. Crystal data

| Atomic parameters |     |       |      |        |             |            |             |                     |
|-------------------|-----|-------|------|--------|-------------|------------|-------------|---------------------|
| Atom              | Ox. | Wyck. | Site | S.O.F. | x/a         | y/b        | z/c         | U [Å <sup>2</sup> ] |
| Re1               |     | 1a    |      | 1      | 0.92660(2)  | 0.27630(1) | -0.02164(1) |                     |
| S1                |     | 1a    |      | 1      | 1.00842(14) | 0.83614(8) | 0.56351(6)  |                     |
| N1                |     | 1a    |      | 1      | 0.5616(4)   | 0.1577(3)  | 0.1324(2)   |                     |
| H1N               |     | 1a    |      | 1      | 0.643(6)    | 0.168(4)   | 0.155(3)    | 0.011(11)           |
| N2                |     | 1a    |      | 1      | 1.0992(5)   | 0.8214(3)  | 0.7253(2)   |                     |
| N3                |     | 1a    |      | 1      | 1.3668(5)   | 1.3275(3)  | 0.7724(3)   |                     |
| O1                |     | 1a    |      | 1      | 0.4266(4)   | 0.1150(3)  | -0.0044(2)  |                     |
| O2                |     | 1a    |      | 1      | 0.7268(4)   | 0.4378(2)  | 0.5423(2)   |                     |
| O3                |     | 1a    |      | 1      | 1.2608(5)   | 0.4043(3)  | 0.0823(3)   |                     |
| O4                |     | 1a    |      | 1      | 0.9834(6)   | 0.4070(3)  | -0.1705(3)  |                     |
| O5                |     | 1a    |      | 1      | 0.6978(6)   | 0.4178(3)  | 0.0774(3)   |                     |
| C1                |     | 1a    |      | 1      | 0.8970(5)   | 0.1283(3)  | 0.0401(3)   |                     |
| H1                |     | 1a    |      | 1      | 0.92250     | 0.13250    | 0.10220     | 0.0250              |
| C2                |     | 1a    |      | 1      | 1.0171(5)   | 0.1201(3)  | -0.0303(3)  |                     |
| H2                |     | 1a    |      | 1      | 1.13680     | 0.11770    | -0.02310    | 0.0300              |
| C3                |     | 1a    |      | 1      | 0.9279(5)   | 0.1163(3)  | -0.1123(3)  |                     |
| H3                |     | 1a    |      | 1      | 0.97720     | 0.11120    | -0.16980    | 0.0300              |
| C4                |     | 1a    |      | 1      | 0.7507(5)   | 0.1214(3)  | -0.0940(3)  |                     |
| H4                |     | 1a    |      | 1      | 0.66120     | 0.12000    | -0.13700    | 0.0260              |
| C5                |     | 1a    |      | 1      | 0.7322(5)   | 0.1289(3)  | 0.0004(2)   |                     |
| C6                |     | 1a    |      | 1      | 0.5606(5)   | 0.1337(3)  | 0.0429(3)   |                     |
| C7                |     | 1a    |      | 1      | 0.3989(5)   | 0.1638(3)  | 0.1786(3)   |                     |
| H7A               |     | 1a    |      | 1      | 0.31360     | 0.09680    | 0.16040     | 0.0290              |
| H7B               |     | 1a    |      | 1      | 0.34860     | 0.22010    | 0.16050     | 0.0290              |
| C8                |     | 1a    |      | 1      | 0.4302(5)   | 0.1861(3)  | 0.2798(3)   |                     |
| H8A               |     | 1a    |      | 1      | 0.49930     | 0.13710    | 0.29630     | 0.0290              |
| H8B               |     | 1a    |      | 1      | 0.31630     | 0.17280    | 0.30850     | 0.0290              |
| C9                |     | 1a    |      | 1      | 0.5260(6)   | 0.2981(3)  | 0.3169(3)   |                     |
| H9A               |     | 1a    |      | 1      | 0.44900     | 0.34670    | 0.30910     | 0.0290              |
| H9B               |     | 1a    |      | 1      | 0.63100     | 0.31520    | 0.28180     | 0.0290              |
| C10               |     | 1a    |      | 1      | 0.5813(6)   | 0.3150(3)  | 0.4161(3)   |                     |
| H10A              |     | 1a    |      | 1      | 0.47670     | 0.29890    | 0.45180     | 0.0290              |
| H10B              |     | 1a    |      | 1      | 0.65860     | 0.26670    | 0.42450     | 0.0290              |
| C11               |     | 1a    |      | 1      | 0.6763(6)   | 0.4268(3)  | 0.4494(3)   |                     |
| H11A              |     | 1a    |      | 1      | 0.78110     | 0.44360    | 0.41400     | 0.0290              |
| H11B              |     | 1a    |      | 1      | 0.59900     | 0.47550    | 0.44240     | 0.0290              |
| C12               |     | 1a    |      | 1      | 0.9507(5)   | 0.7145(3)  | 0.5938(3)   |                     |

|      |    |   |           |              |             |        |
|------|----|---|-----------|--------------|-------------|--------|
| C13  | 1a | 1 | 0.8572(5) | 0.6210(3)    | 0.5428(3)   |        |
| H13  | 1a | 1 | 0.82000   | 0.61710      | 0.48230     | 0.0270 |
| C14  | 1a | 1 | 0.8206(5) | 0.5339(3)    | 0.5839(3)   |        |
| C15  | 1a | 1 | 0.8785(6) | 0.5400(3)    | 0.6730(3)   |        |
| H15  | 1a | 1 | 0.85300   | 0.47940      | 0.69970     | 0.0320 |
| C16  | 1a | 1 | 0.9721(6) | 0.6332(3)    | 0.7222(3)   |        |
| H16  | 1a | 1 | 1.01040   | 0.63670      | 0.78250     | 0.0310 |
| C17  | 1a | 1 | 1.0099(5) | 0.7216(3)    | 0.6831(3)   |        |
| C18  | 1a | 1 | 1.1059(5) | 0.8891(3)    | 0.6720(3)   |        |
| C19  | 1a | 1 | 1.1803(5) | 1.0015(3)    | 0.6952(3)   |        |
| C20  | 1a | 1 | 1.2760(5) | 1.0451(3)    | 0.7763(3)   |        |
| H20  | 1a | 1 | 1.29820   | 1.00010      | 0.81510     | 0.0240 |
| C21  | 1a | 1 | 1.3384(5) | 1.1510(3)    | 0.8012(3)   |        |
| H21  | 1a | 1 | 1.40430   | 1.17740      | 0.85630     | 0.0240 |
| C22  | 1a | 1 | 1.3071(5) | 1.2217(3)    | 0.7467(3)   |        |
| C23  | 1a | 1 | 1.2114(6) | 1.1783(3)    | 0.6645(3)   |        |
| H23  | 1a | 1 | 1.18920   | 1.22310      | 0.62540     | 0.0350 |
| C24  | 1a | 1 | 1.1498(6) | 1.0708(3)    | 0.6405(3)   |        |
| H24  | 1a | 1 | 1.08500   | 1.04350      | 0.58510     | 0.0330 |
| C25  | 1a | 1 | 1.3503(8) | 1.3978(4)    | 0.7110(4)   |        |
| H25A | 1a | 1 | 1.41080   | 1.37830      | 0.65590     | 0.0480 |
| H25B | 1a | 1 | 1.40270   | 1.47000      | 0.73950     | 0.0480 |
| H25C | 1a | 1 | 1.22650   | 1.39240      | 0.69610     | 0.0480 |
| C26  | 1a | 1 | 1.4719(6) | 1.3689(4)    | 0.8549(3)   |        |
| H26A | 1a | 1 | 1.40660   | 1.34670      | 0.90560     | 0.0410 |
| H26B | 1a | 1 | 1.50020   | 1.44560      | 0.86410     | 0.0410 |
| H26C | 1a | 1 | 1.58020   | 1.34240      | 0.85070     | 0.0410 |
| C27  | 1a | 1 | 1.1338(6) | 0.3602(4)    | 0.0423(3)   |        |
| C28  | 1a | 1 | 0.9637(6) | 0.3598(4)    | -0.1141(3)  |        |
| C29  | 1a | 1 | 0.7884(7) | 0.3687(4)    | 0.0402(4)   |        |
| Cl1  | 1a | 1 | 0.3167(2) | -0.01040(13) | 0.41464(14) |        |
| Cl2  | 1a | 1 | 0.2387(2) | -0.22911(15) | 0.32531(14) |        |
| C59  | 1a | 1 | 0.3730(9) | -0.1328(5)   | 0.4025(5)   |        |
| H59A | 1a | 1 | 0.49510   | -0.12620     | 0.38340     | 0.0670 |
| H59B | 1a | 1 | 0.36780   | -0.15490     | 0.46170     | 0.0670 |

**Anisotropic displacement parameters, in Å<sup>2</sup>**

| <b>Atom</b> | <b>U<sub>11</sub></b> | <b>U<sub>22</sub></b> | <b>U<sub>33</sub></b> | <b>U<sub>12</sub></b> | <b>U<sub>13</sub></b> | <b>U<sub>23</sub></b> |
|-------------|-----------------------|-----------------------|-----------------------|-----------------------|-----------------------|-----------------------|
| Re1         | 0.01791(9)            | 0.01831(9)            | 0.02425(9)            | 0.00111(5)            | 0.00001(6)            | 0.00432(6)            |
| S1          | 0.0310(5)             | 0.0201(4)             | 0.0183(4)             | 0.0022(4)             | -0.0035(4)            | 0.0042(3)             |
| N1          | 0.0161(15)            | 0.0238(16)            | 0.0230(16)            | 0.0019(12)            | -0.0009(12)           | 0.0019(13)            |
| N2          | 0.0255(16)            | 0.0196(15)            | 0.0181(14)            | 0.0025(12)            | -0.0020(12)           | 0.0019(12)            |

|     |            |            |            |             |             |             |
|-----|------------|------------|------------|-------------|-------------|-------------|
| N3  | 0.037(2)   | 0.0187(16) | 0.0329(19) | 0.0013(14)  | -0.0064(16) | 0.0058(14)  |
| O1  | 0.0165(13) | 0.0431(18) | 0.0245(14) | 0.0052(12)  | -0.0013(11) | 0.0062(13)  |
| O2  | 0.0356(17) | 0.0213(14) | 0.0230(14) | -0.0005(12) | -0.0038(12) | 0.0023(11)  |
| O3  | 0.0341(19) | 0.050(2)   | 0.057(2)   | -0.0122(17) | -0.0085(17) | 0.002(2)    |
| O4  | 0.056(3)   | 0.046(2)   | 0.047(2)   | 0.0013(19)  | -0.0011(19) | 0.0255(19)  |
| O5  | 0.047(2)   | 0.037(2)   | 0.086(3)   | 0.0190(19)  | 0.018(2)    | -0.005(2)   |
| C1  | 0.0187(16) | 0.0207(17) | 0.0228(18) | 0.0034(13)  | -0.0028(14) | 0.0036(14)  |
| C2  | 0.0173(17) | 0.0231(19) | 0.033(2)   | 0.0032(14)  | 0.0005(15)  | 0.0038(16)  |
| C3  | 0.0207(18) | 0.0243(19) | 0.028(2)   | 0.0047(15)  | 0.0060(15)  | 0.0026(16)  |
| C4  | 0.0175(16) | 0.0239(18) | 0.0224(18) | 0.0045(14)  | 0.0002(13)  | 0.0014(14)  |
| C5  | 0.0171(15) | 0.0162(16) | 0.0190(16) | 0.0021(12)  | -0.0018(13) | -0.0009(13) |
| C6  | 0.0157(16) | 0.0186(16) | 0.0252(18) | 0.0025(13)  | 0.0003(13)  | 0.0077(14)  |
| C7  | 0.0187(17) | 0.0267(19) | 0.0233(18) | 0.0011(15)  | -0.0006(14) | 0.0005(15)  |
| C8  | 0.0225(18) | 0.0246(19) | 0.0230(18) | 0.0010(15)  | 0.0017(14)  | 0.0016(15)  |
| C9  | 0.0266(19) | 0.0206(18) | 0.0237(18) | 0.0036(15)  | -0.0001(15) | 0.0014(15)  |
| C10 | 0.0266(19) | 0.0192(17) | 0.0246(19) | 0.0035(15)  | -0.0004(15) | -0.0002(15) |
| C11 | 0.0261(19) | 0.0221(18) | 0.0213(18) | 0.0025(15)  | -0.0009(15) | 0.0002(15)  |
| C12 | 0.0226(17) | 0.0215(17) | 0.0177(16) | 0.0050(14)  | 0.0007(13)  | 0.0026(14)  |
| C13 | 0.0249(18) | 0.0215(18) | 0.0215(18) | 0.0041(15)  | -0.0019(14) | 0.0032(14)  |
| C14 | 0.0252(19) | 0.0205(18) | 0.0218(18) | 0.0024(15)  | 0.0006(14)  | 0.0001(14)  |
| C15 | 0.030(2)   | 0.026(2)   | 0.0234(19) | 0.0008(16)  | -0.0001(16) | 0.0088(16)  |
| C16 | 0.029(2)   | 0.0238(19) | 0.0221(18) | 0.0001(16)  | -0.0041(15) | 0.0058(15)  |
| C17 | 0.0192(16) | 0.0209(17) | 0.0198(17) | 0.0036(14)  | -0.0005(13) | 0.0007(14)  |
| C18 | 0.0190(16) | 0.0223(18) | 0.0190(16) | 0.0043(14)  | -0.0002(13) | 0.0030(14)  |
| C19 | 0.0222(17) | 0.0219(18) | 0.0179(16) | 0.0034(14)  | 0.0023(13)  | 0.0044(14)  |
| C20 | 0.0187(16) | 0.0238(18) | 0.0191(16) | 0.0056(14)  | 0.0004(13)  | 0.0074(14)  |
| C21 | 0.0173(16) | 0.0221(18) | 0.0206(17) | 0.0025(13)  | -0.0021(13) | 0.0025(14)  |
| C22 | 0.0231(18) | 0.0211(18) | 0.0226(18) | 0.0038(14)  | 0.0021(14)  | 0.0038(15)  |
| C23 | 0.038(2)   | 0.025(2)   | 0.026(2)   | 0.0034(17)  | -0.0051(17) | 0.0093(16)  |
| C24 | 0.033(2)   | 0.0235(19) | 0.0232(19) | 0.0011(16)  | -0.0072(16) | 0.0036(15)  |
| C25 | 0.055(3)   | 0.022(2)   | 0.043(3)   | 0.000(2)    | -0.004(2)   | 0.012(2)    |
| C26 | 0.034(2)   | 0.024(2)   | 0.039(2)   | 0.0013(18)  | -0.0084(19) | -0.0048(18) |
| C27 | 0.0228(19) | 0.028(2)   | 0.031(2)   | -0.0070(16) | -0.0039(16) | 0.0003(17)  |
| C28 | 0.034(2)   | 0.026(2)   | 0.030(2)   | 0.0001(17)  | -0.0009(18) | 0.0110(17)  |
| C29 | 0.034(2)   | 0.023(2)   | 0.047(3)   | 0.0047(18)  | 0.002(2)    | 0.002(2)    |
| Cl1 | 0.0626(10) | 0.0425(8)  | 0.0921(13) | 0.0059(7)   | 0.0068(9)   | 0.0218(9)   |
| Cl2 | 0.0548(10) | 0.0539(9)  | 0.0861(13) | 0.0060(8)   | 0.0077(9)   | -0.0013(9)  |
| C59 | 0.052(4)   | 0.056(4)   | 0.060(4)   | 0.019(3)    | 0.007(3)    | 0.009(3)    |

**Selected geometric informations**

| <b>Atoms 1,2</b> | <b>d 1,2 [?]</b> | <b>Atoms 1,2</b> | <b>d 1,2 [?]</b> |
|------------------|------------------|------------------|------------------|
| Re1—C27          | 1.915(4)         | C8—H8B           | 0.9900           |

|         |          |          |          |
|---------|----------|----------|----------|
| Re1—C29 | 1.919(5) | C9—C10   | 1.525(6) |
| Re1—C28 | 1.924(4) | C9—H9A   | 0.9900   |
| Re1—C1  | 2.294(4) | C9—H9B   | 0.9900   |
| Re1—C5  | 2.296(4) | C10—C11  | 1.510(5) |
| Re1—C2  | 2.305(4) | C10—H10A | 0.9900   |
| Re1—C4  | 2.310(4) | C10—H10B | 0.9900   |
| Re1—C3  | 2.311(4) | C11—H11A | 0.9900   |
| S1—C12  | 1.729(4) | C11—H11B | 0.9900   |
| S1—C18  | 1.768(4) | C12—C13  | 1.395(5) |
| N1—C6   | 1.334(5) | C12—C17  | 1.408(5) |
| N1—C7   | 1.464(5) | C13—C14  | 1.389(6) |
| N1—H1N  | 0.70(5)  | C13—H13  | 0.9500   |
| N2—C18  | 1.305(5) | C14—C15  | 1.404(6) |
| N2—C17  | 1.401(5) | C15—C16  | 1.383(6) |
| N3—C22  | 1.369(5) | C15—H15  | 0.9500   |
| N3—C26  | 1.448(6) | C16—C17  | 1.387(6) |
| N3—C25  | 1.454(6) | C16—H16  | 0.9500   |
| O1—C6   | 1.224(4) | C18—C19  | 1.463(5) |
| O2—C14  | 1.372(5) | C19—C24  | 1.398(6) |
| O2—C11  | 1.433(5) | C19—C20  | 1.400(5) |
| O3—C27  | 1.152(5) | C20—C21  | 1.371(5) |
| O4—C28  | 1.140(6) | C20—H20  | 0.9500   |
| O5—C29  | 1.141(6) | C21—C22  | 1.411(5) |
| C1—C5   | 1.424(5) | C21—H21  | 0.9500   |
| C1—C2   | 1.427(6) | C22—C23  | 1.414(6) |
| C1—H1   | 0.9500   | C23—C24  | 1.388(6) |
| C2—C3   | 1.411(6) | C23—H23  | 0.9500   |
| C2—H2   | 0.9500   | C24—H24  | 0.9500   |
| C3—C4   | 1.428(5) | C25—H25A | 0.9800   |
| C3—H3   | 0.9500   | C25—H25B | 0.9800   |
| C4—C5   | 1.424(5) | C25—H25C | 0.9800   |
| C4—H4   | 0.9500   | C26—H26A | 0.9800   |
| C5—C6   | 1.498(5) | C26—H26B | 0.9800   |
| C7—C8   | 1.517(6) | C26—H26C | 0.9800   |
| C7—H7A  | 0.9900   | Cl1—C59  | 1.746(7) |
| C7—H7B  | 0.9900   | Cl2—C59  | 1.733(7) |
| C8—C9   | 1.523(6) | C59—H59A | 0.9900   |
| C8—H8A  | 0.9900   | C59—H59B | 0.9900   |

| Atoms 1,2,3 | Angle 1,2,3 [i°] | Atoms 1,2,3 | Angle 1,2,3 [i°] |
|-------------|------------------|-------------|------------------|
| C27—Re1—C29 | 90.8(2)          | C9—C8—H8B   | 108.900          |

|             |            |               |          |
|-------------|------------|---------------|----------|
| C27—Re1—C28 | 89.9(2)    | H8A—C8—H8B    | 107.700  |
| C29—Re1—C28 | 89.6(2)    | C8—C9—C10     | 112.9(3) |
| C27—Re1—C1  | 100.48(17) | C8—C9—H9A     | 109.000  |
| C29—Re1—C1  | 110.31(19) | C10—C9—H9A    | 109.000  |
| C28—Re1—C1  | 157.18(18) | C8—C9—H9B     | 109.000  |
| C27—Re1—C5  | 133.85(17) | C10—C9—H9B    | 109.000  |
| C29—Re1—C5  | 92.92(18)  | H9A—C9—H9B    | 107.800  |
| C28—Re1—C5  | 136.11(16) | C11—C10—C9    | 110.8(3) |
| C1—Re1—C5   | 36.14(13)  | C11—C10—H10A  | 109.500  |
| C27—Re1—C2  | 94.79(18)  | C9—C10—H10A   | 109.500  |
| C29—Re1—C2  | 146.4(2)   | C11—C10—H10B  | 109.500  |
| C28—Re1—C2  | 123.38(19) | C9—C10—H10B   | 109.500  |
| C1—Re1—C2   | 36.14(15)  | H10A—C10—H10B | 108.100  |
| C5—Re1—C2   | 60.03(14)  | O2—C11—C10    | 108.4(3) |
| C27—Re1—C4  | 154.54(18) | O2—C11—H11A   | 110.000  |
| C29—Re1—C4  | 110.77(18) | C10—C11—H11A  | 110.000  |
| C28—Re1—C4  | 103.22(17) | O2—C11—H11B   | 110.000  |
| C1—Re1—C4   | 60.11(14)  | C10—C11—H11B  | 110.000  |
| C5—Re1—C4   | 36.03(13)  | H11A—C11—H11B | 108.400  |
| C2—Re1—C4   | 59.77(14)  | C13—C12—C17   | 122.2(4) |
| C27—Re1—C3  | 121.57(18) | C13—C12—S1    | 128.4(3) |
| C29—Re1—C3  | 146.75(18) | C17—C12—S1    | 109.4(3) |
| C28—Re1—C3  | 97.32(18)  | C14—C13—C12   | 117.6(4) |
| C1—Re1—C3   | 59.93(15)  | C14—C13—H13   | 121.200  |
| C5—Re1—C3   | 59.98(14)  | C12—C13—H13   | 121.200  |
| C2—Re1—C3   | 35.58(15)  | O2—C14—C13    | 123.7(4) |
| C4—Re1—C3   | 35.99(14)  | O2—C14—C15    | 115.5(4) |
| C12—S1—C18  | 89.74(18)  | C13—C14—C15   | 120.8(4) |
| C6—N1—C7    | 120.5(3)   | C16—C15—C14   | 120.8(4) |
| C6—N1—H1N   | 117.(4)    | C16—C15—H15   | 119.600  |
| C7—N1—H1N   | 123.(4)    | C14—C15—H15   | 119.600  |
| C18—N2—C17  | 111.1(3)   | C15—C16—C17   | 119.7(4) |
| C22—N3—C26  | 120.0(4)   | C15—C16—H16   | 120.200  |
| C22—N3—C25  | 120.4(4)   | C17—C16—H16   | 120.200  |
| C26—N3—C25  | 118.8(4)   | C16—C17—N2    | 125.9(3) |
| C14—O2—C11  | 116.9(3)   | C16—C17—C12   | 119.0(4) |
| C5—C1—C2    | 107.7(3)   | N2—C17—C12    | 115.0(4) |
| C5—C1—Re1   | 72.0(2)    | N2—C18—C19    | 126.1(3) |
| C2—C1—Re1   | 72.3(2)    | N2—C18—S1     | 114.7(3) |
| C5—C1—H1    | 126.200    | C19—C18—S1    | 119.2(3) |
| C2—C1—H1    | 126.200    | C24—C19—C20   | 117.1(4) |

|            |          |               |          |
|------------|----------|---------------|----------|
| Re1—C1—H1  | 121.300  | C24—C19—C18   | 121.6(3) |
| C3—C2—C1   | 108.3(3) | C20—C19—C18   | 121.2(3) |
| C3—C2—Re1  | 72.4(2)  | C21—C20—C19   | 121.8(4) |
| C1—C2—Re1  | 71.5(2)  | C21—C20—H20   | 119.100  |
| C3—C2—H2   | 125.800  | C19—C20—H20   | 119.100  |
| C1—C2—H2   | 125.800  | C20—C21—C22   | 121.5(3) |
| Re1—C2—H2  | 121.900  | C20—C21—H21   | 119.300  |
| C2—C3—C4   | 108.2(4) | C22—C21—H21   | 119.300  |
| C2—C3—Re1  | 72.0(2)  | N3—C22—C21    | 121.4(4) |
| C4—C3—Re1  | 72.0(2)  | N3—C22—C23    | 121.5(4) |
| C2—C3—H3   | 125.900  | C21—C22—C23   | 117.1(4) |
| C4—C3—H3   | 125.900  | C24—C23—C22   | 120.5(4) |
| Re1—C3—H3  | 121.900  | C24—C23—H23   | 119.700  |
| C5—C4—C3   | 107.7(3) | C22—C23—H23   | 119.700  |
| C5—C4—Re1  | 71.4(2)  | C23—C24—C19   | 122.0(4) |
| C3—C4—Re1  | 72.1(2)  | C23—C24—H24   | 119.000  |
| C5—C4—H4   | 126.200  | C19—C24—H24   | 119.000  |
| C3—C4—H4   | 126.200  | N3—C25—H25A   | 109.500  |
| Re1—C4—H4  | 122.100  | N3—C25—H25B   | 109.500  |
| C1—C5—C4   | 108.1(3) | H25A—C25—H25B | 109.500  |
| C1—C5—C6   | 130.0(3) | N3—C25—H25C   | 109.500  |
| C4—C5—C6   | 121.8(3) | H25A—C25—H25C | 109.500  |
| C1—C5—Re1  | 71.9(2)  | H25B—C25—H25C | 109.500  |
| C4—C5—Re1  | 72.5(2)  | N3—C26—H26A   | 109.500  |
| C6—C5—Re1  | 122.4(3) | N3—C26—H26B   | 109.500  |
| O1—C6—N1   | 122.7(4) | H26A—C26—H26B | 109.500  |
| O1—C6—C5   | 119.9(4) | N3—C26—H26C   | 109.500  |
| N1—C6—C5   | 117.4(3) | H26A—C26—H26C | 109.500  |
| N1—C7—C8   | 111.1(3) | H26B—C26—H26C | 109.500  |
| N1—C7—H7A  | 109.400  | O3—C27—Re1    | 175.2(5) |
| C8—C7—H7A  | 109.400  | O4—C28—Re1    | 178.1(4) |
| N1—C7—H7B  | 109.400  | O5—C29—Re1    | 175.4(5) |
| C8—C7—H7B  | 109.400  | Cl2—C59—Cl1   | 113.5(4) |
| H7A—C7—H7B | 108.000  | Cl2—C59—H59A  | 108.900  |
| C7—C8—C9   | 113.4(4) | Cl1—C59—H59A  | 108.900  |
| C7—C8—H8A  | 108.900  | Cl2—C59—H59B  | 108.900  |
| C9—C8—H8A  | 108.900  | Cl1—C59—H59B  | 108.900  |
| C7—C8—H8B  | 108.900  | H59A—C59—H59B | 107.700  |

| <b>Atoms 1,2,3,4</b> | <b>Tors. an. 1,2,3,4 [i°]</b> | <b>Atoms 1,2,3,4</b> | <b>Tors. an. 1,2,3,4 [i°]</b> |
|----------------------|-------------------------------|----------------------|-------------------------------|
| C27—Re1—C1—C5        | 160.3(2)                      | C28—Re1—C5—C6        | -87.4(4)                      |

|               |           |                 |           |
|---------------|-----------|-----------------|-----------|
| C29—Re1—C1—C5 | 65.5(3)   | C1—Re1—C5—C6    | 126.4(4)  |
| C28—Re1—C1—C5 | -84.1(5)  | C2—Re1—C5—C6    | 164.2(3)  |
| C2—Re1—C1—C5  | -116.0(3) | C4—Re1—C5—C6    | -117.1(4) |
| C4—Re1—C1—C5  | -37.4(2)  | C3—Re1—C5—C6    | -154.5(3) |
| C3—Re1—C1—C5  | -79.2(2)  | C7—N1—C6—O1     | -0.7(6)   |
| C27—Re1—C1—C2 | -83.7(3)  | C7—N1—C6—C5     | 180.0(3)  |
| C29—Re1—C1—C2 | -178.5(3) | C1—C5—C6—O1     | -167.1(4) |
| C28—Re1—C1—C2 | 31.9(5)   | C4—C5—C6—O1     | 11.3(6)   |
| C5—Re1—C1—C2  | 116.0(3)  | Re1—C5—C6—O1    | 99.9(4)   |
| C4—Re1—C1—C2  | 78.6(2)   | C1—C5—C6—N1     | 12.2(6)   |
| C3—Re1—C1—C2  | 36.8(2)   | C4—C5—C6—N1     | -169.4(4) |
| C5—C1—C2—C3   | 0.3(5)    | Re1—C5—C6—N1    | -80.8(4)  |
| Re1—C1—C2—C3  | -63.5(3)  | C6—N1—C7—C8     | 176.8(4)  |
| C5—C1—C2—Re1  | 63.8(3)   | N1—C7—C8—C9     | 72.3(5)   |
| C27—Re1—C2—C3 | -141.8(3) | C7—C8—C9—C10    | -171.2(4) |
| C29—Re1—C2—C3 | 119.5(4)  | C8—C9—C10—C11   | 179.7(4)  |
| C28—Re1—C2—C3 | -48.8(3)  | C14—O2—C11—C10  | 177.8(4)  |
| C1—Re1—C2—C3  | 117.0(3)  | C9—C10—C11—O2   | -179.4(3) |
| C5—Re1—C2—C3  | 79.3(2)   | C18—S1—C12—C13  | 178.1(4)  |
| C4—Re1—C2—C3  | 37.4(2)   | C18—S1—C12—C17  | -0.5(3)   |
| C27—Re1—C2—C1 | 101.2(3)  | C17—C12—C13—C14 | 1.1(6)    |
| C29—Re1—C2—C1 | 2.6(4)    | S1—C12—C13—C14  | -177.3(3) |
| C28—Re1—C2—C1 | -165.8(2) | C11—O2—C14—C13  | 4.8(6)    |
| C5—Re1—C2—C1  | -37.7(2)  | C11—O2—C14—C15  | -175.7(4) |
| C4—Re1—C2—C1  | -79.6(2)  | C12—C13—C14—O2  | 178.5(4)  |
| C3—Re1—C2—C1  | -117.0(3) | C12—C13—C14—C15 | -1.0(6)   |
| C1—C2—C3—C4   | -0.3(5)   | O2—C14—C15—C16  | -179.0(4) |
| Re1—C2—C3—C4  | -63.3(3)  | C13—C14—C15—C16 | 0.5(7)    |
| C1—C2—C3—Re1  | 62.9(3)   | C14—C15—C16—C17 | -0.2(7)   |
| C27—Re1—C3—C2 | 46.3(3)   | C15—C16—C17—N2  | 178.3(4)  |
| C29—Re1—C3—C2 | -118.7(4) | C15—C16—C17—C12 | 0.4(6)    |
| C28—Re1—C3—C2 | 140.7(3)  | C18—N2—C17—C16  | -176.7(4) |
| C1—Re1—C3—C2  | -37.4(2)  | C18—N2—C17—C12  | 1.3(5)    |
| C5—Re1—C3—C2  | -79.4(3)  | C13—C12—C17—C16 | -0.8(6)   |
| C4—Re1—C3—C2  | -116.9(4) | S1—C12—C17—C16  | 177.8(3)  |
| C27—Re1—C3—C4 | 163.2(3)  | C13—C12—C17—N2  | -179.0(4) |
| C29—Re1—C3—C4 | -1.8(5)   | S1—C12—C17—N2   | -0.3(4)   |
| C28—Re1—C3—C4 | -102.4(3) | C17—N2—C18—C19  | 176.4(4)  |
| C1—Re1—C3—C4  | 79.5(3)   | C17—N2—C18—S1   | -1.7(4)   |
| C5—Re1—C3—C4  | 37.5(2)   | C12—S1—C18—N2   | 1.3(3)    |
| C2—Re1—C3—C4  | 116.9(4)  | C12—S1—C18—C19  | -176.9(3) |

|               |           |                 |           |
|---------------|-----------|-----------------|-----------|
| C2—C3—C4—C5   | 0.3(5)    | N2—C18—C19—C24  | -166.6(4) |
| Re1—C3—C4—C5  | -63.0(3)  | S1—C18—C19—C24  | 11.4(6)   |
| C2—C3—C4—Re1  | 63.3(3)   | N2—C18—C19—C20  | 9.3(6)    |
| C27—Re1—C4—C5 | 81.5(5)   | S1—C18—C19—C20  | -172.7(3) |
| C29—Re1—C4—C5 | -64.6(3)  | C24—C19—C20—C21 | -0.4(6)   |
| C28—Re1—C4—C5 | -159.3(2) | C18—C19—C20—C21 | -176.5(4) |
| C1—Re1—C4—C5  | 37.5(2)   | C19—C20—C21—C22 | 0.9(6)    |
| C2—Re1—C4—C5  | 79.5(2)   | C26—N3—C22—C21  | 3.1(7)    |
| C3—Re1—C4—C5  | 116.4(3)  | C25—N3—C22—C21  | 173.0(4)  |
| C27—Re1—C4—C3 | -35.0(5)  | C26—N3—C22—C23  | -176.8(4) |
| C29—Re1—C4—C3 | 178.9(3)  | C25—N3—C22—C23  | -7.0(7)   |
| C28—Re1—C4—C3 | 84.2(3)   | C20—C21—C22—N3  | 178.8(4)  |
| C1—Re1—C4—C3  | -78.9(3)  | C20—C21—C22—C23 | -1.3(6)   |
| C5—Re1—C4—C3  | -116.4(3) | N3—C22—C23—C24  | -179.0(4) |
| C2—Re1—C4—C3  | -36.9(2)  | C21—C22—C23—C24 | 1.1(7)    |
| C2—C1—C5—C4   | -0.1(4)   | C22—C23—C24—C19 | -0.5(7)   |
| Re1—C1—C5—C4  | 63.9(3)   | C20—C19—C24—C23 | 0.2(7)    |
| C2—C1—C5—C6   | 178.5(4)  | C18—C19—C24—C23 | 176.2(4)  |
| Re1—C1—C5—C6  | -117.5(4) | C29—Re1—C27—O3  | 129.(5)   |
| C2—C1—C5—Re1  | -64.0(3)  | C28—Re1—C27—O3  | -141.(5)  |
| C3—C4—C5—C1   | -0.1(4)   | C1—Re1—C27—O3   | 18.(5)    |
| Re1—C4—C5—C1  | -63.5(3)  | C5—Re1—C27—O3   | 34.(6)    |
| C3—C4—C5—C6   | -178.8(3) | C2—Re1—C27—O3   | -18.(5)   |
| Re1—C4—C5—C6  | 117.8(3)  | C4—Re1—C27—O3   | -20.(6)   |
| C3—C4—C5—Re1  | 63.4(3)   | C3—Re1—C27—O3   | -43.(6)   |
| C27—Re1—C5—C1 | -27.4(3)  | C27—Re1—C28—O4  | 152.(15)  |
| C29—Re1—C5—C1 | -121.3(3) | C29—Re1—C28—O4  | -117.(15) |
| C28—Re1—C5—C1 | 146.2(3)  | C1—Re1—C28—O4   | 34.(15)   |
| C2—Re1—C5—C1  | 37.7(2)   | C5—Re1—C28—O4   | -23.(15)  |
| C4—Re1—C5—C1  | 116.5(3)  | C2—Re1—C28—O4   | 56.(15)   |
| C3—Re1—C5—C1  | 79.0(2)   | C4—Re1—C28—O4   | -6.(15)   |
| C27—Re1—C5—C4 | -143.9(3) | C3—Re1—C28—O4   | 30.(15)   |
| C29—Re1—C5—C4 | 122.2(3)  | C27—Re1—C29—O5  | -140.(7)  |
| C28—Re1—C5—C4 | 29.7(4)   | C28—Re1—C29—O5  | 130.(7)   |
| C1—Re1—C5—C4  | -116.5(3) | C1—Re1—C29—O5   | -39.(7)   |
| C2—Re1—C5—C4  | -78.7(2)  | C5—Re1—C29—O5   | -6.(7)    |
| C3—Re1—C5—C4  | -37.4(2)  | C2—Re1—C29—O5   | -41.(7)   |
| C27—Re1—C5—C6 | 99.0(3)   | C4—Re1—C29—O5   | 26.(7)    |
| C29—Re1—C5—C6 | 5.2(3)    | C3—Re1—C29—O5   | 27.(7)    |



7.  $^1\text{H}$ -NMR,  $^{13}\text{C}$ -NMR, MS and HRMS data of synthesized compounds

$^1\text{H}$ -NMR for compound **1**

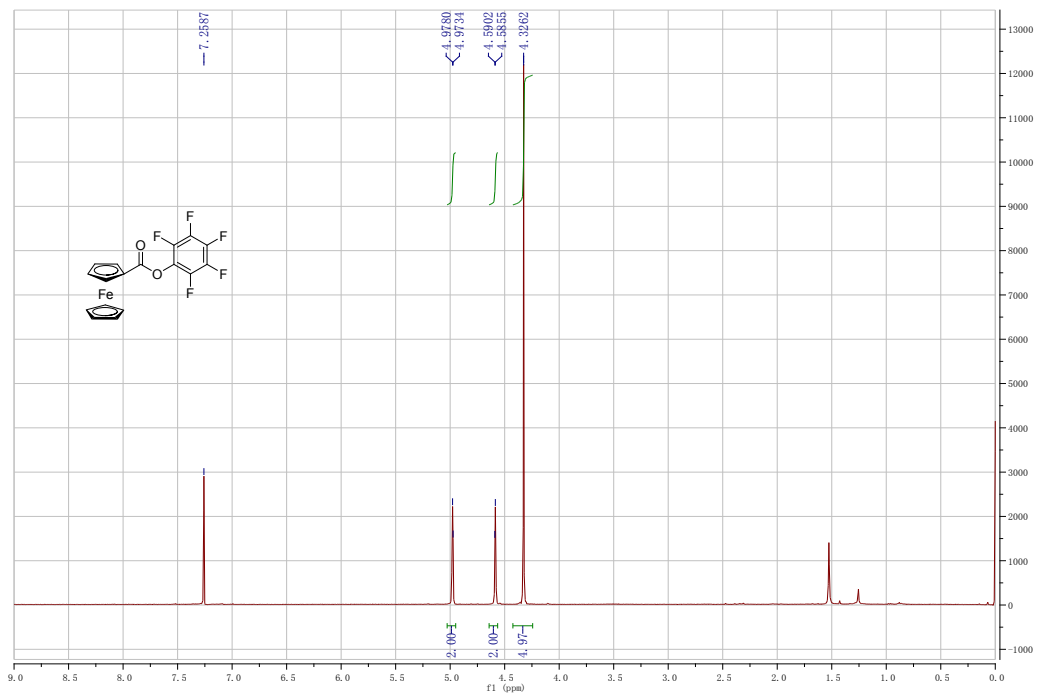

MS for compound 1

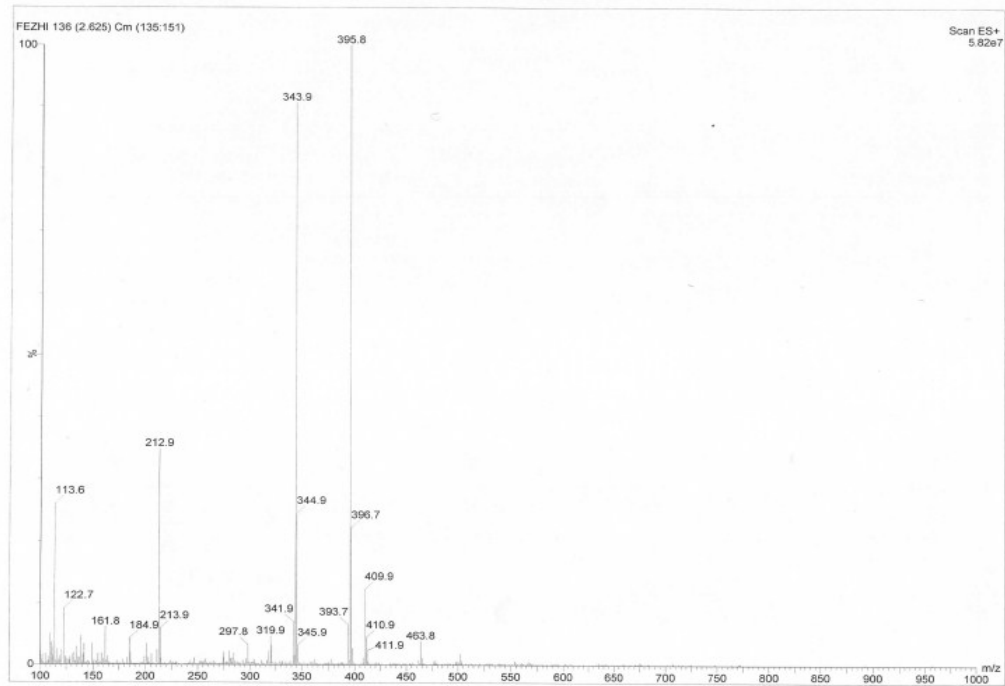

<sup>1</sup>H-NMR for compound 8

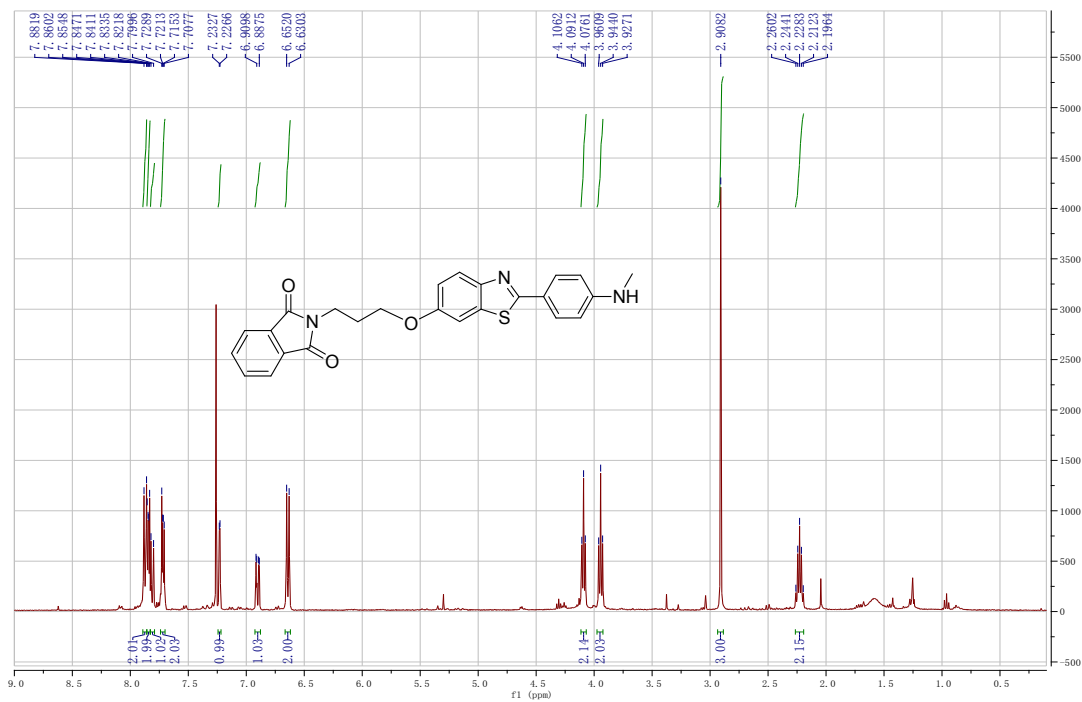

MS for compound 8

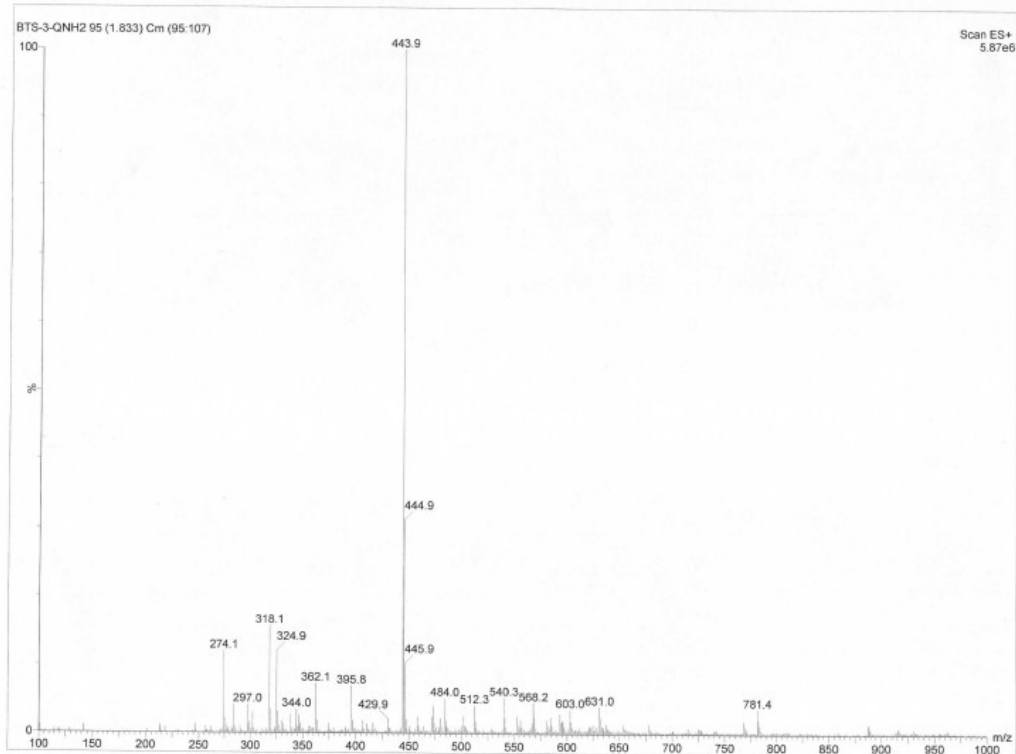

<sup>1</sup>H-NMR for compound 9

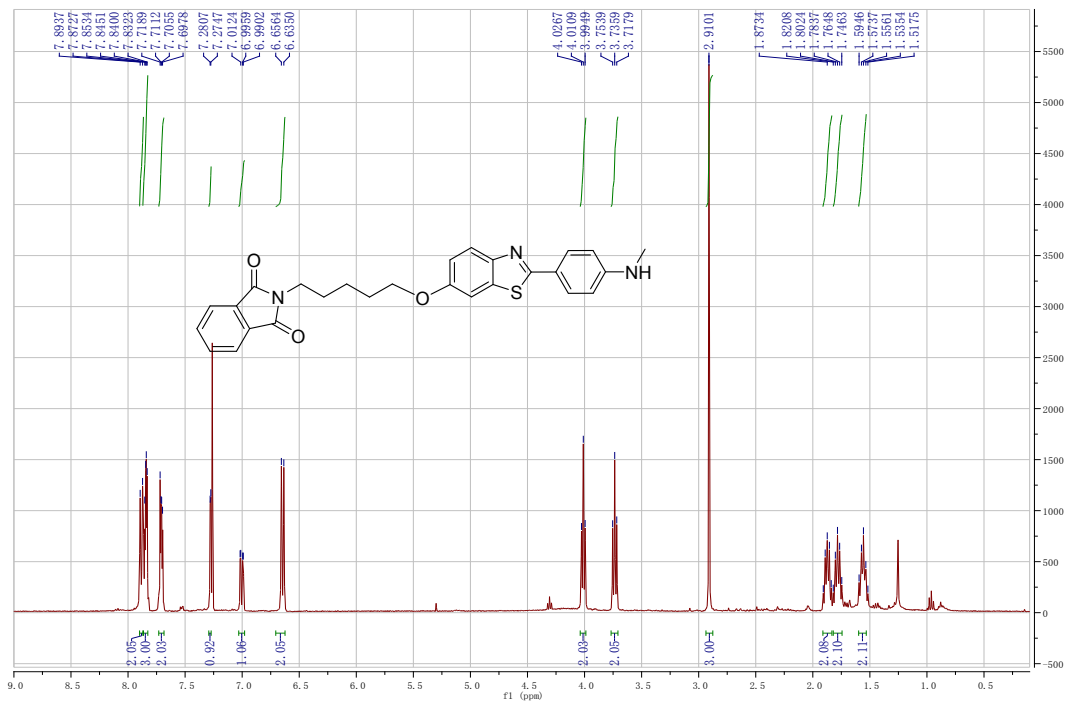

MS for compound 9

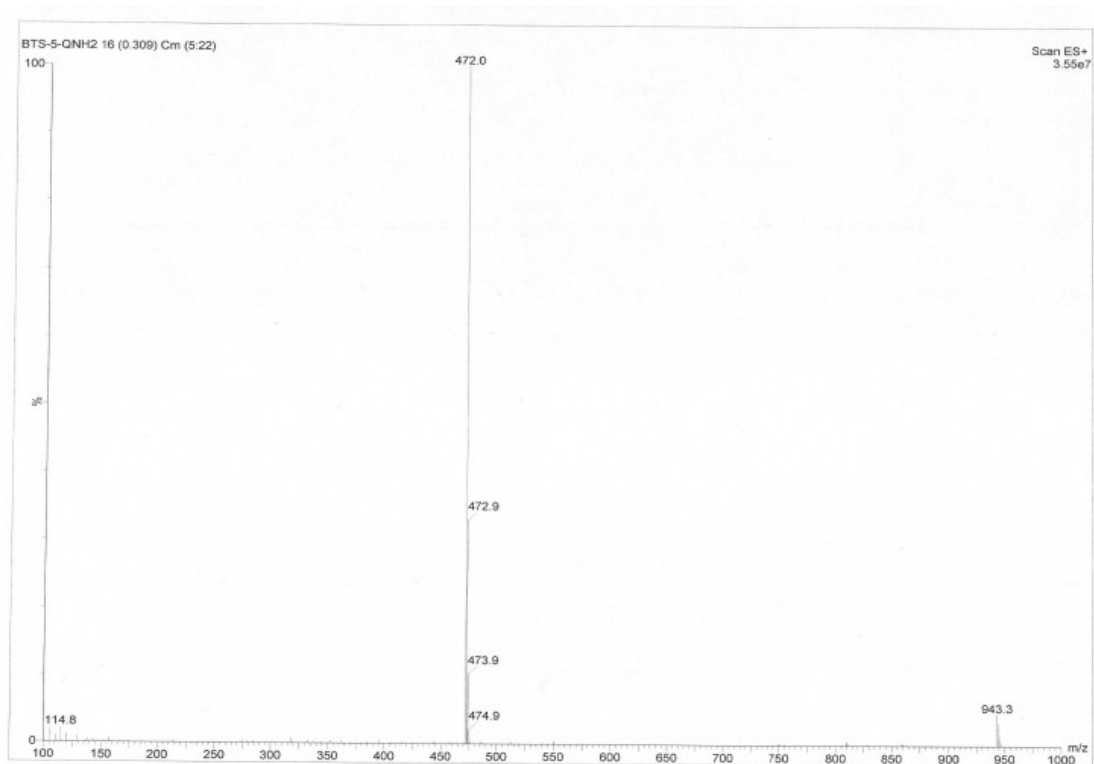

<sup>1</sup>H-NMR for compound 10

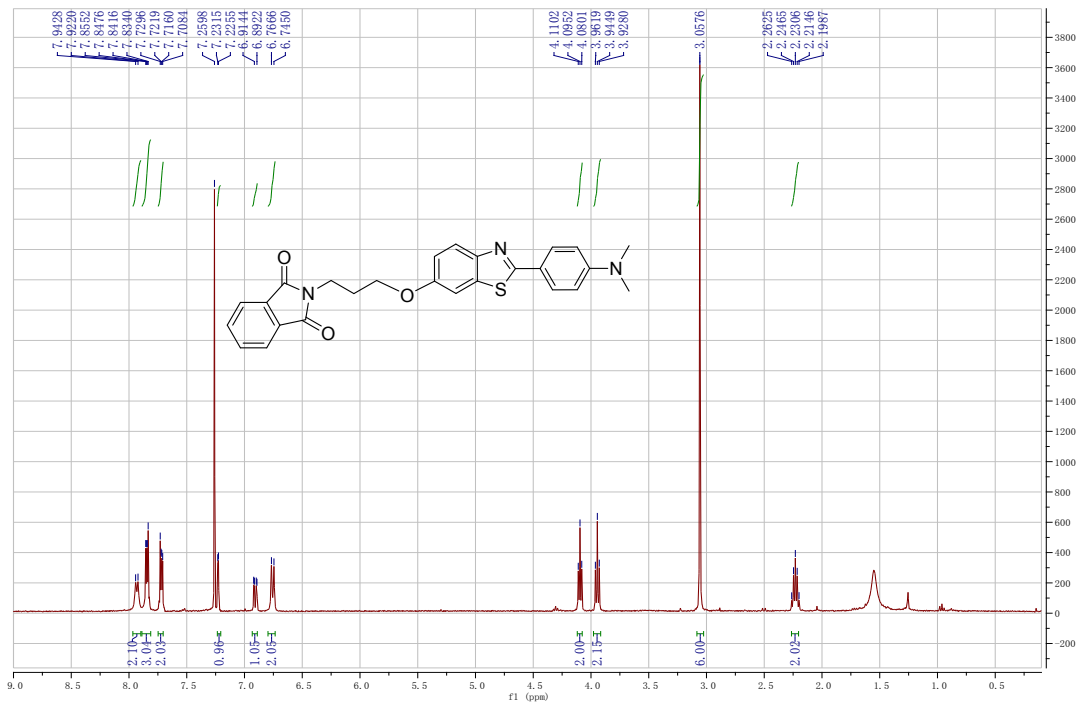

MS for compound 10

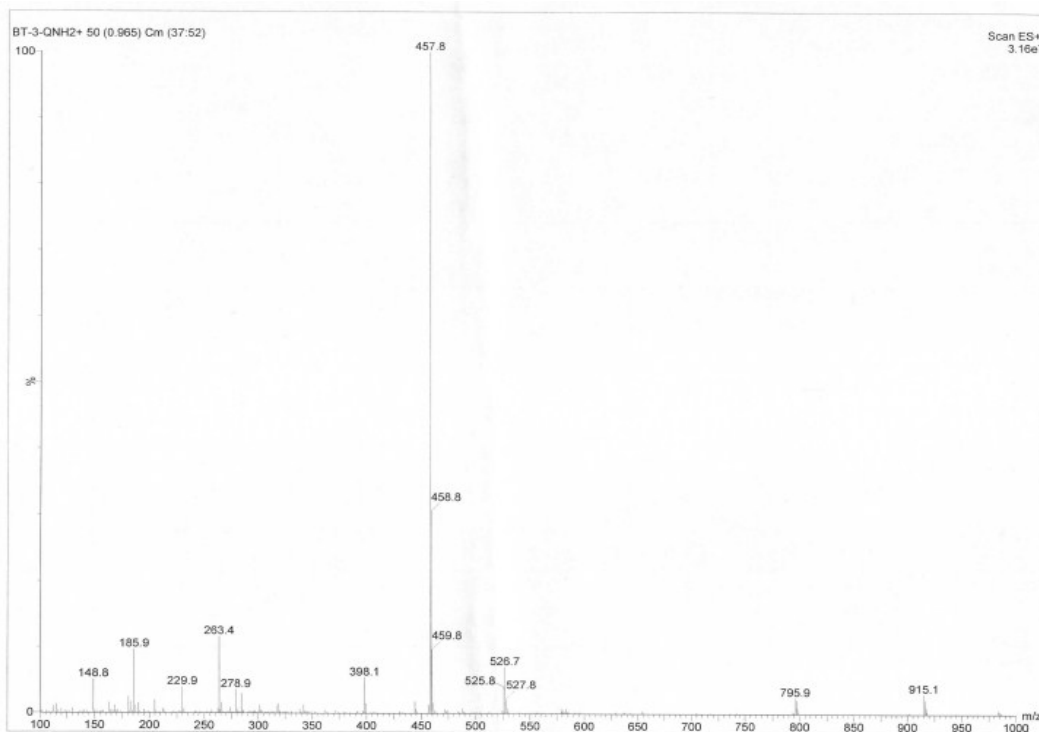

<sup>1</sup>H-NMR for compound 11

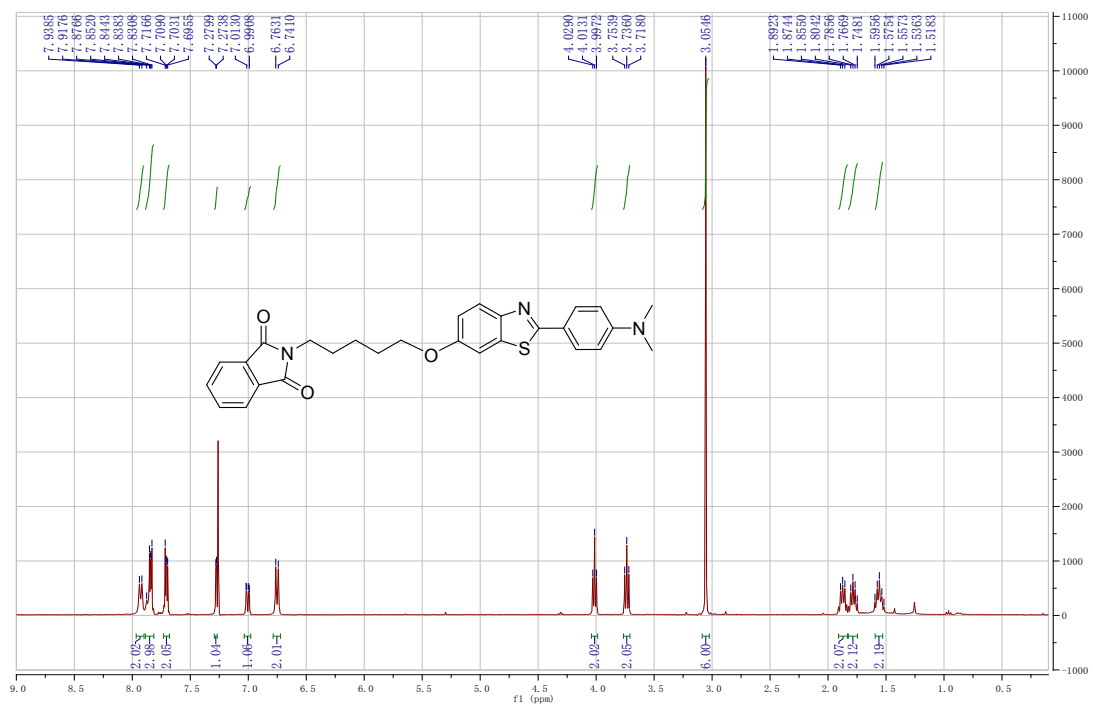

MS for compound 11

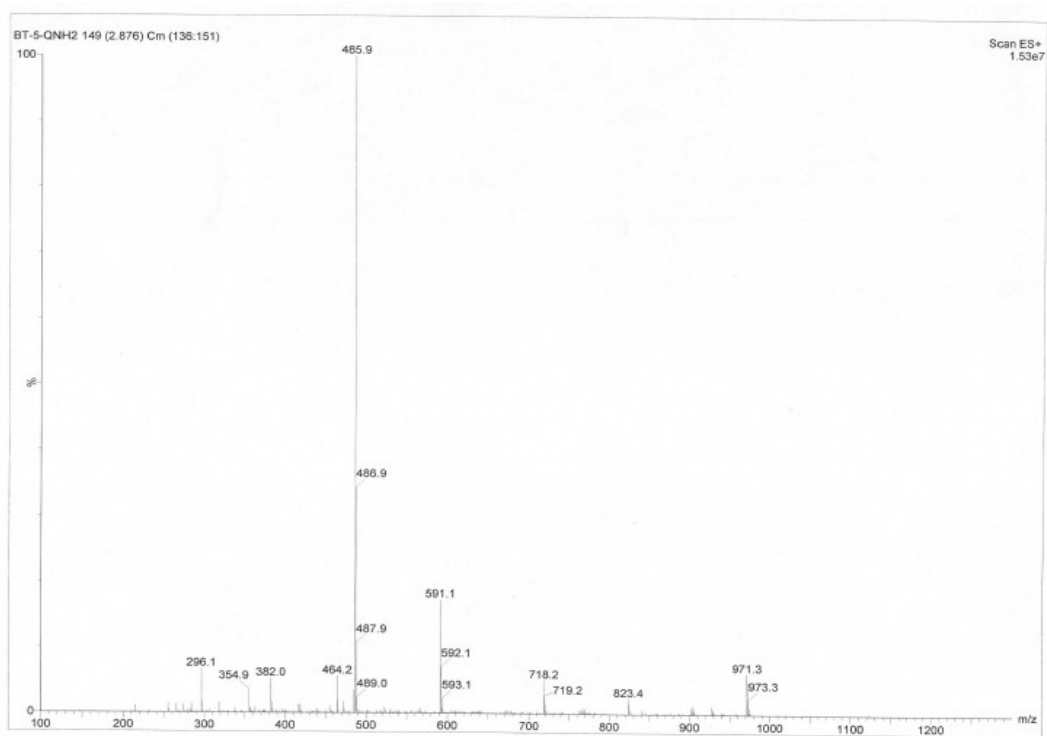

<sup>1</sup>H-NMR for compound 12

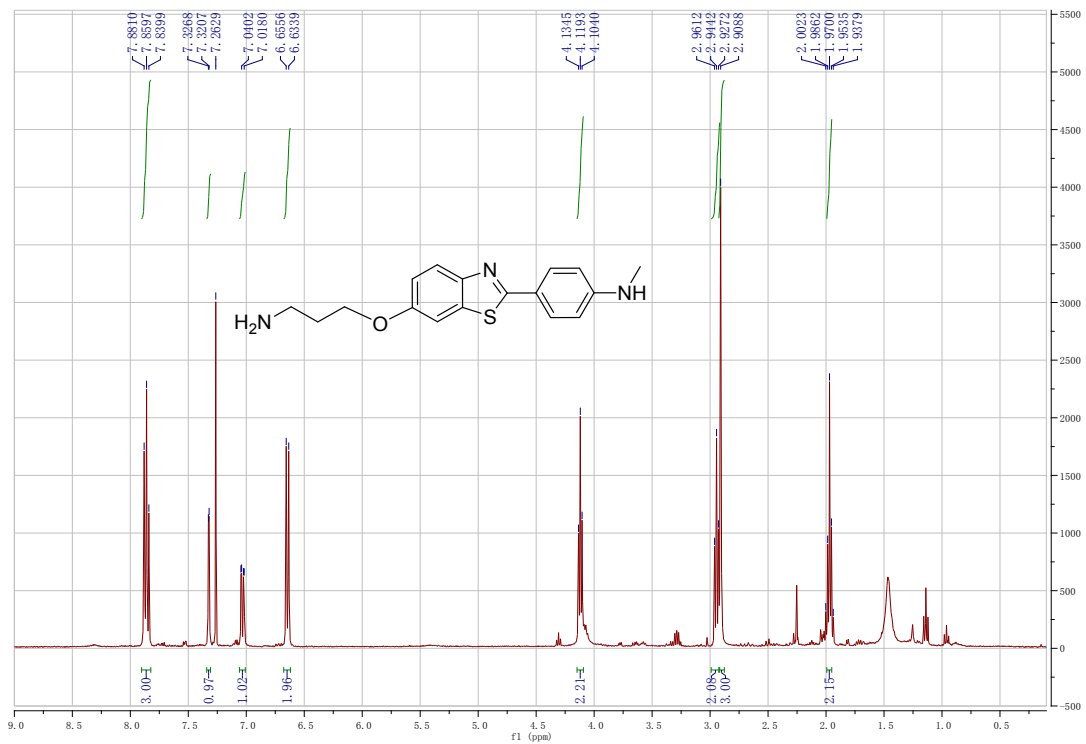

MS for compound 12

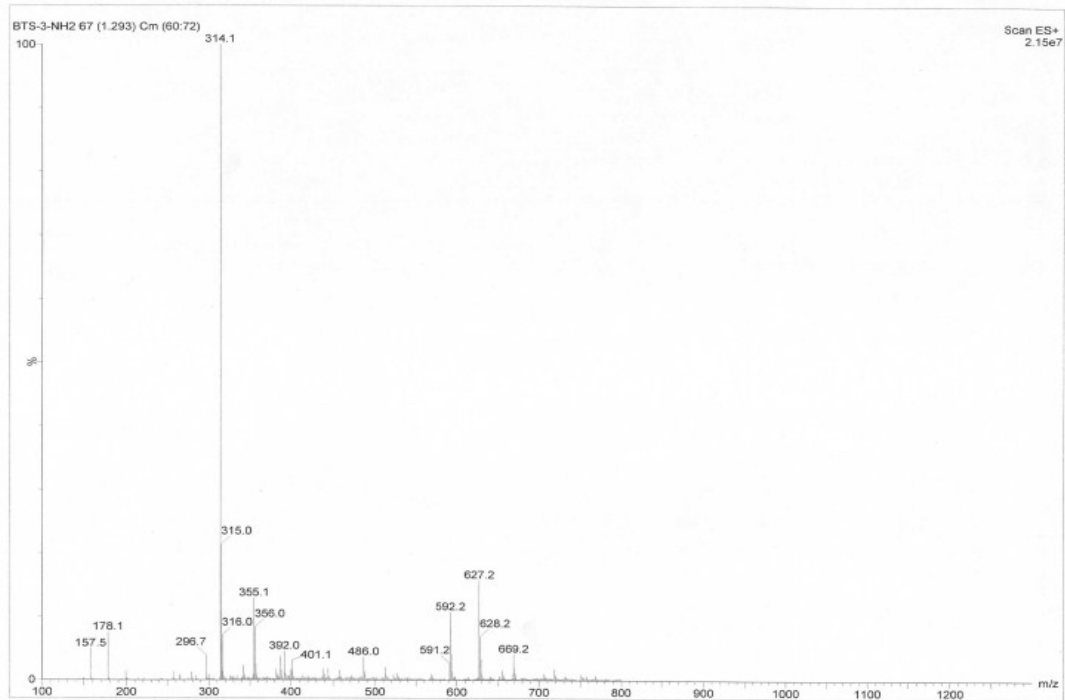

<sup>1</sup>H-NMR for compound 13

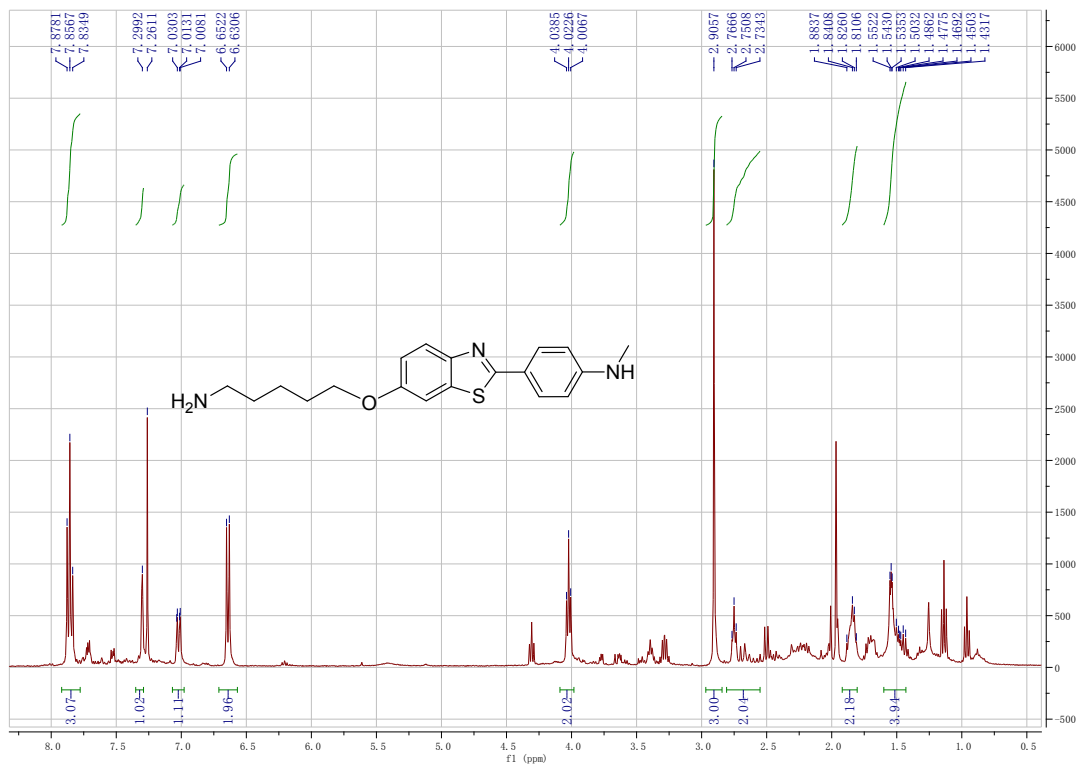

MS for compound 13

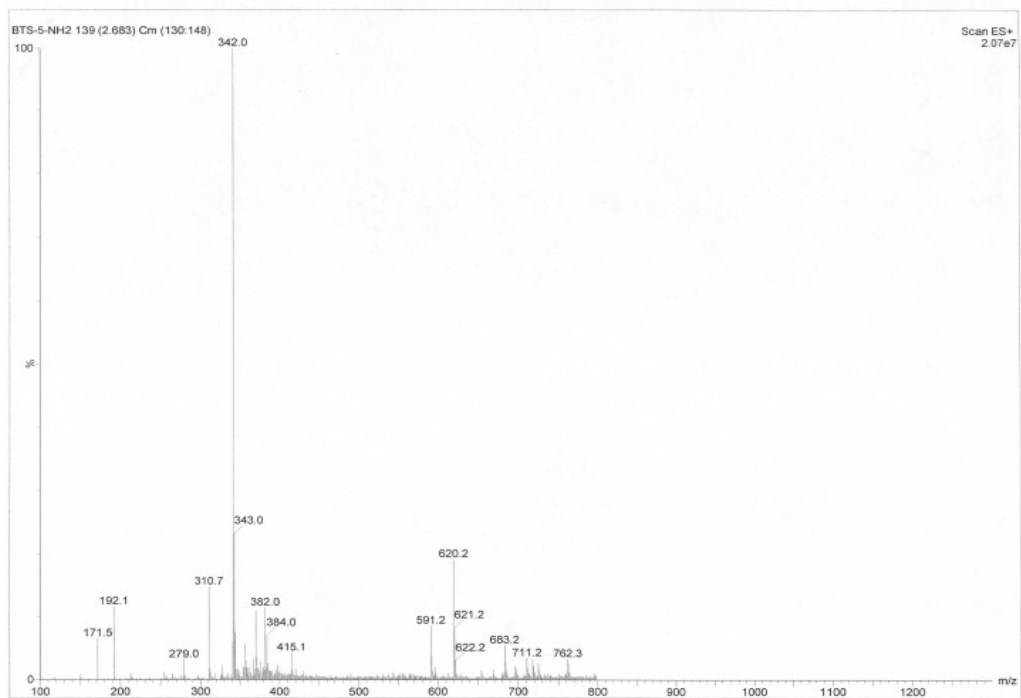

<sup>1</sup>H-NMR for compound 14



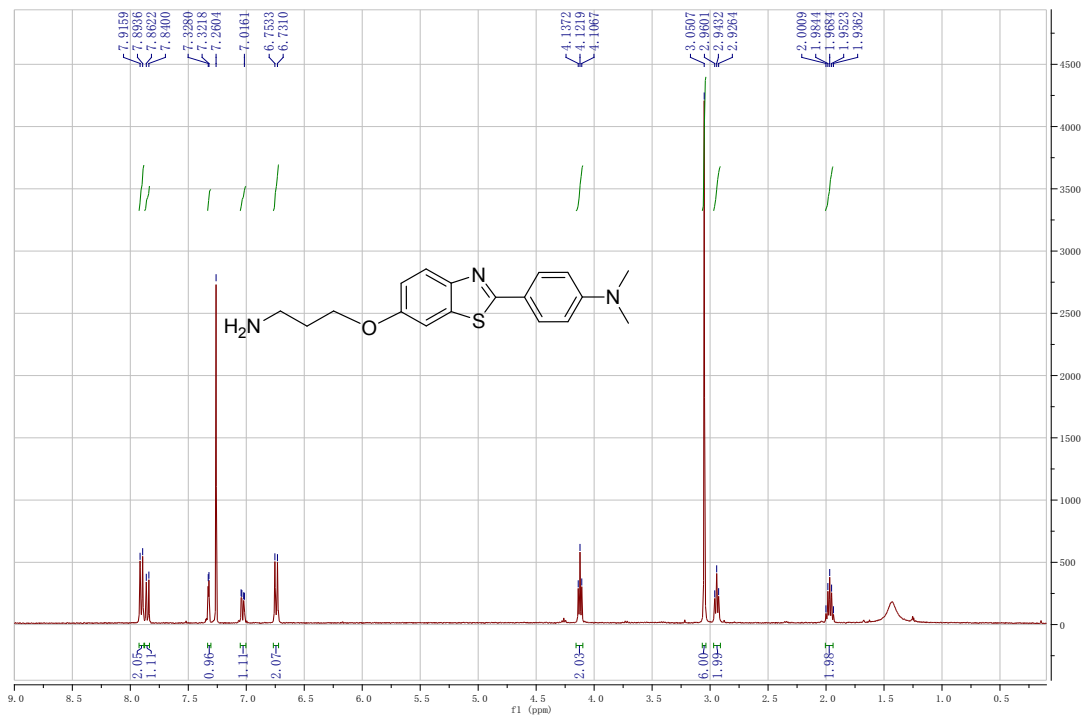

MS for compound 14

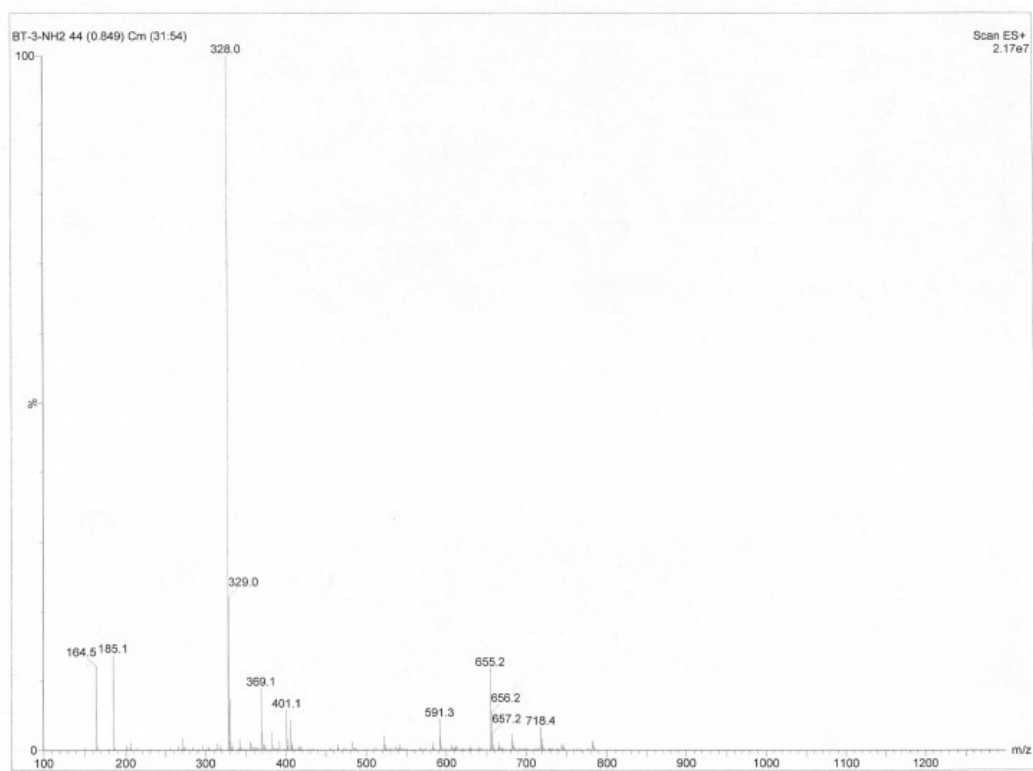

<sup>1</sup>H-NMR for compound 15

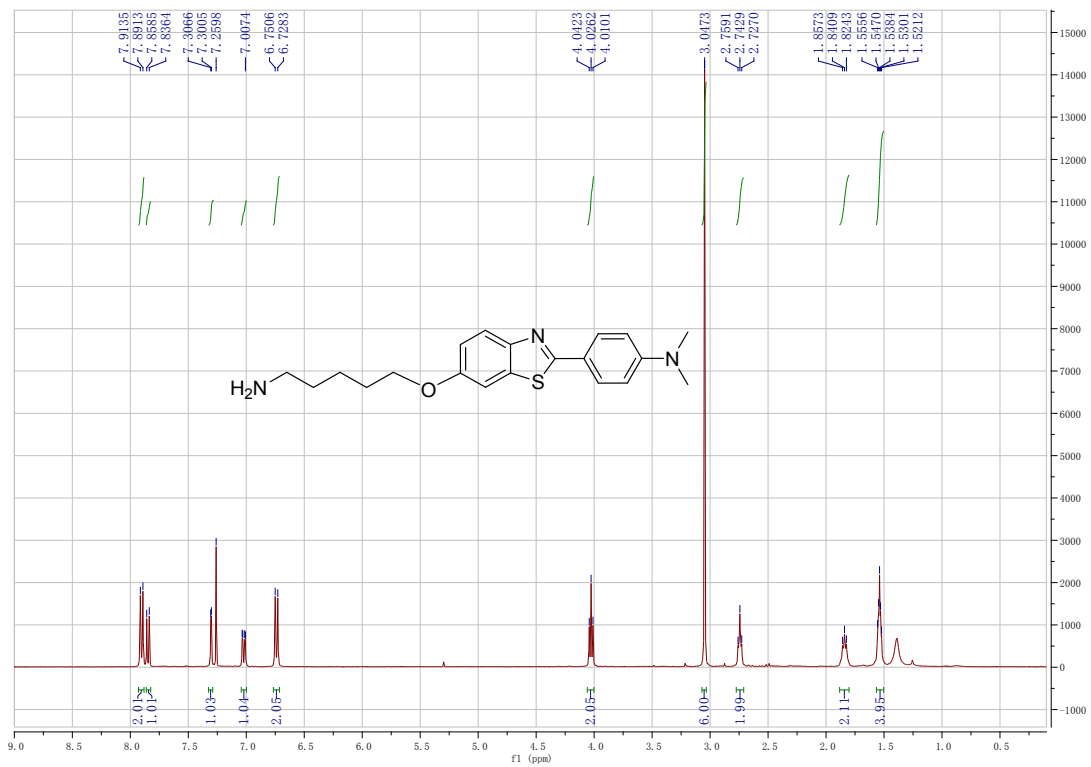

MS for compound 15

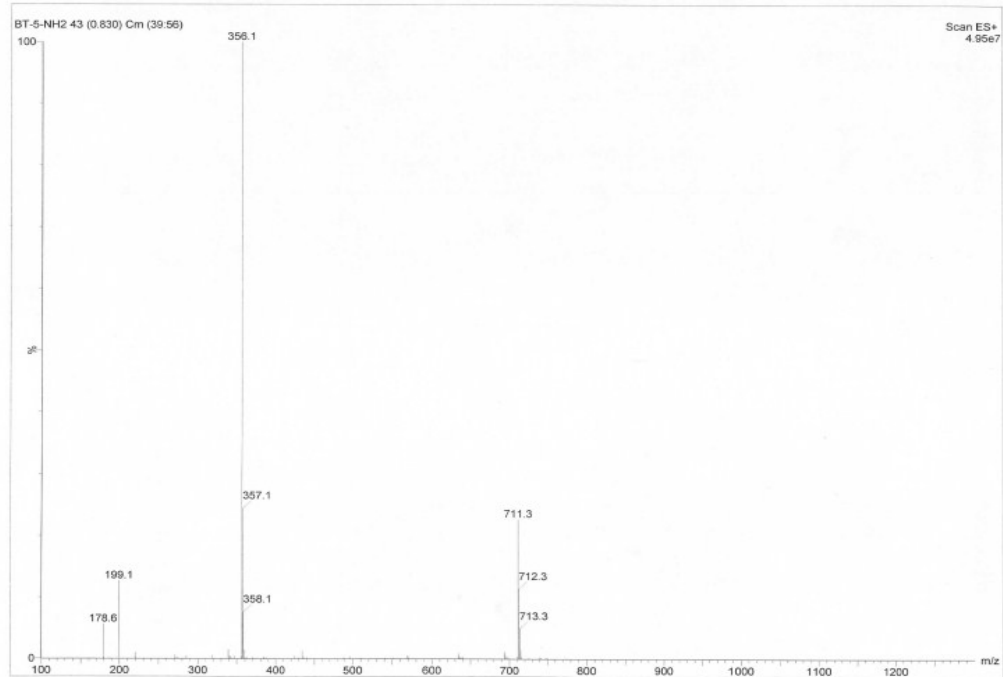

<sup>1</sup>H-NMR for compound 16

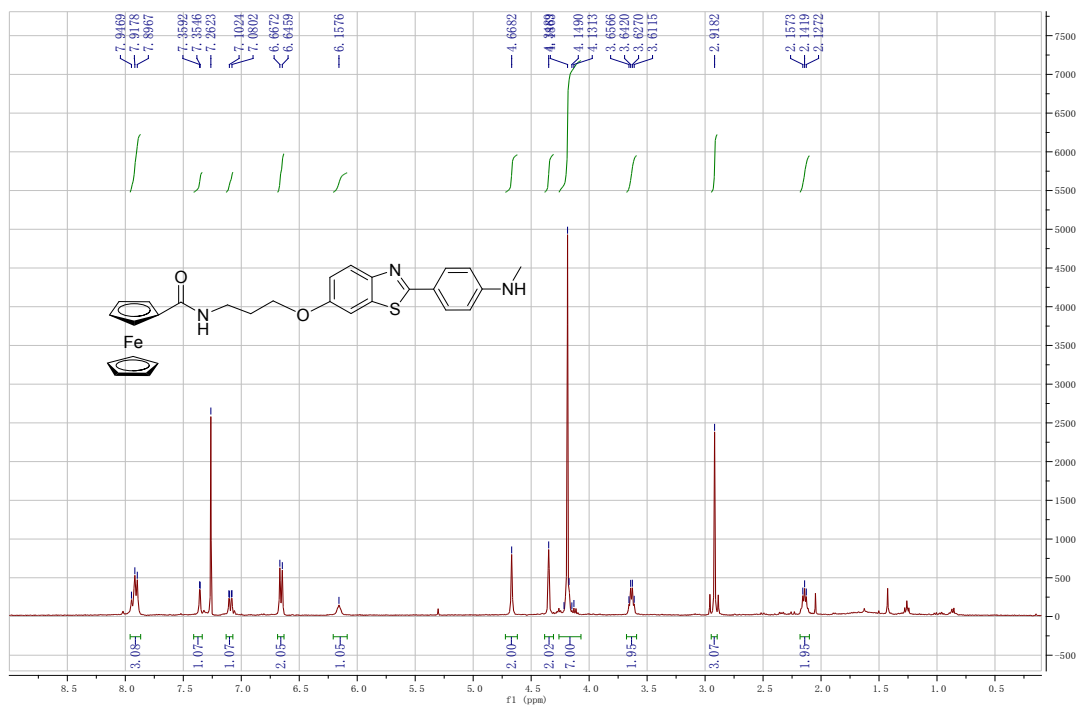

HRMS for compound 16

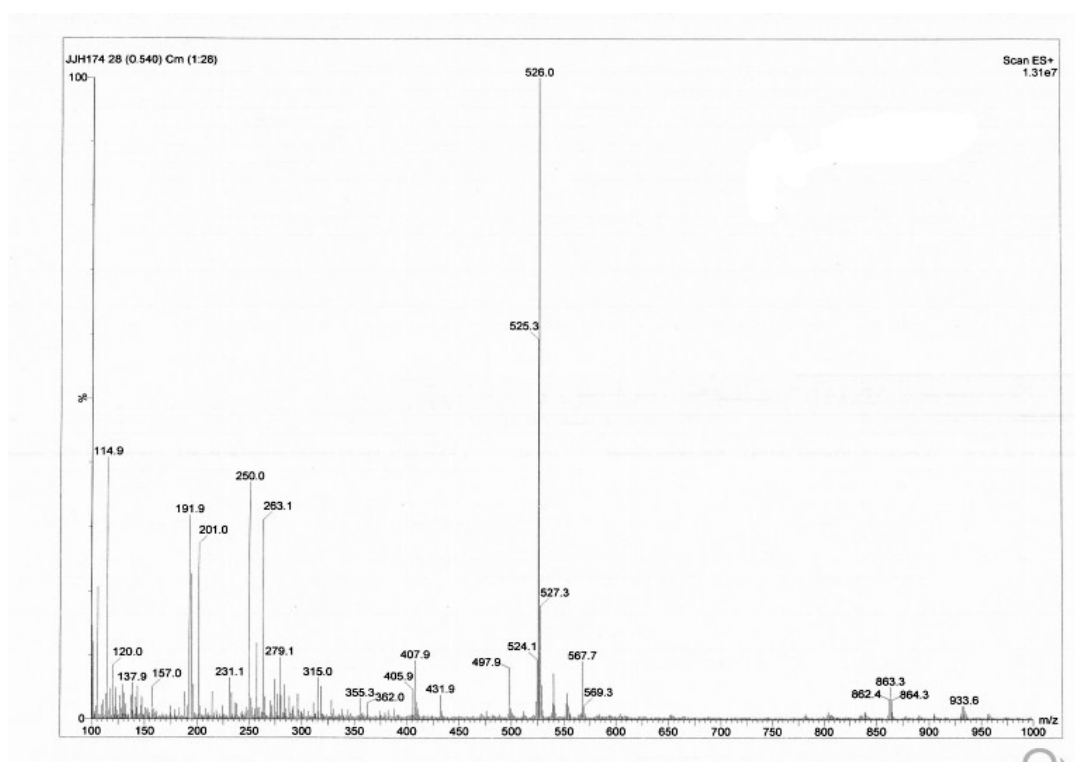

<sup>1</sup>H-NMR for compound 17

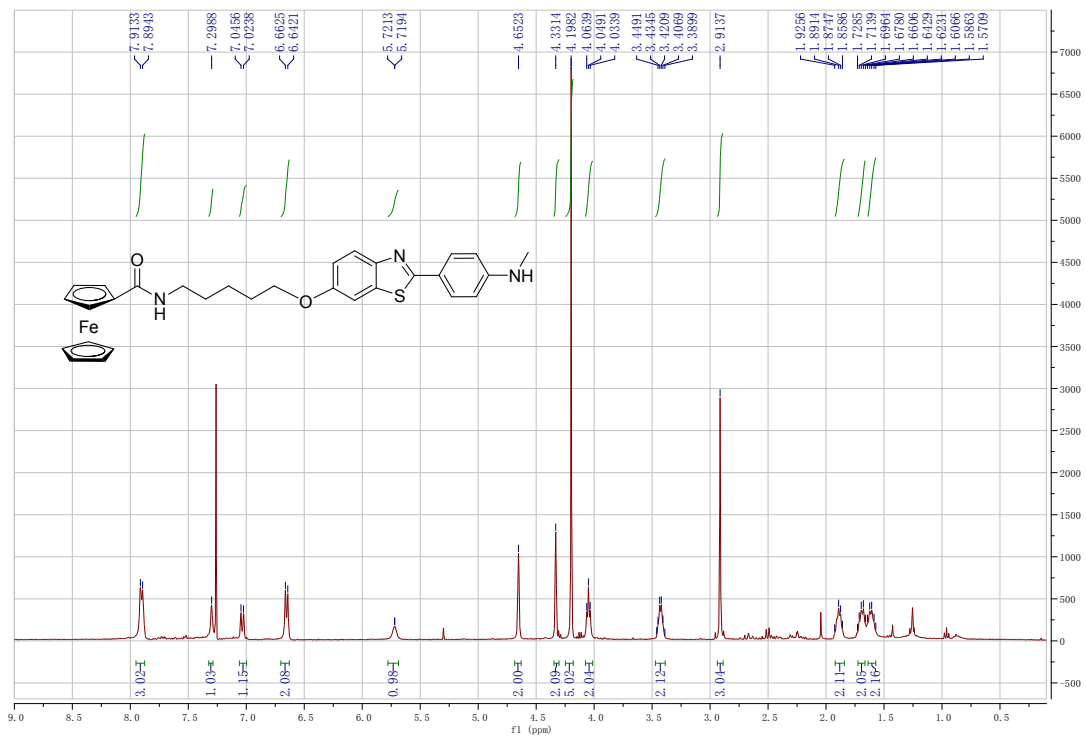

HRMS for compound 17

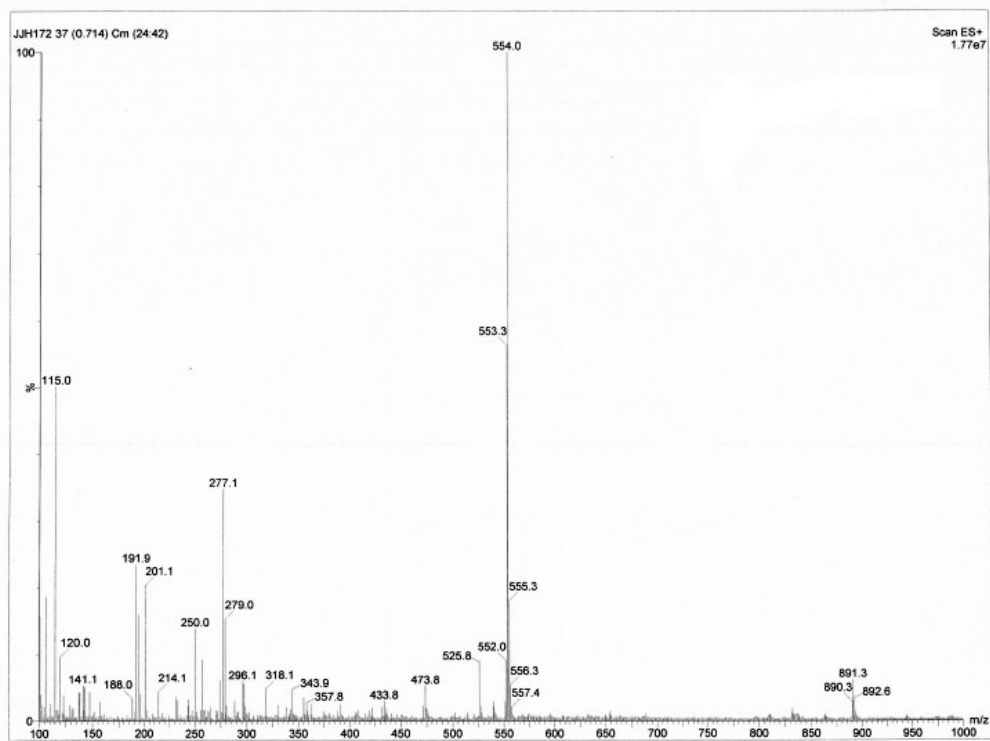

<sup>1</sup>H-NMR for compound 18

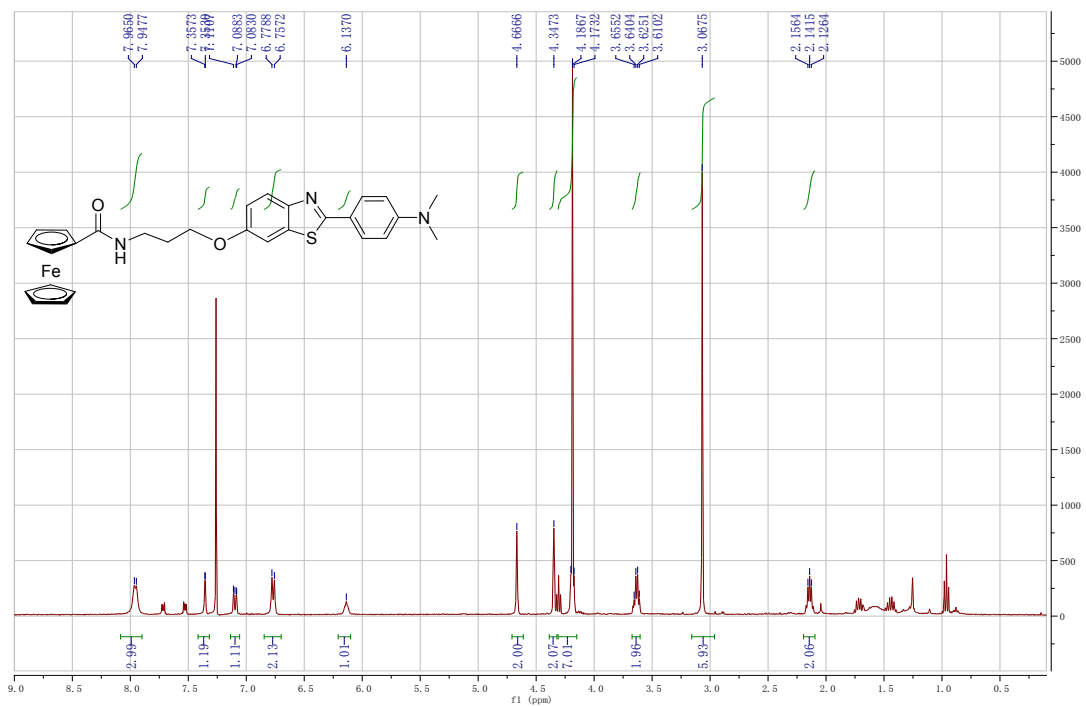

MS for compound 18

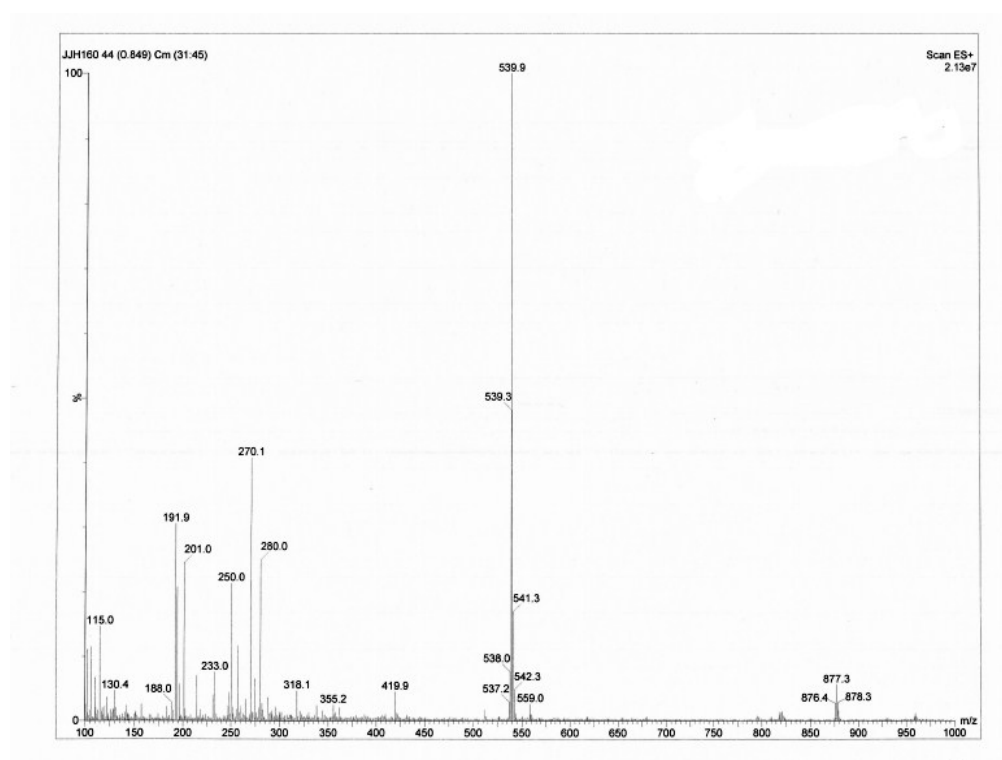

<sup>1</sup>H-NMR for compound 19

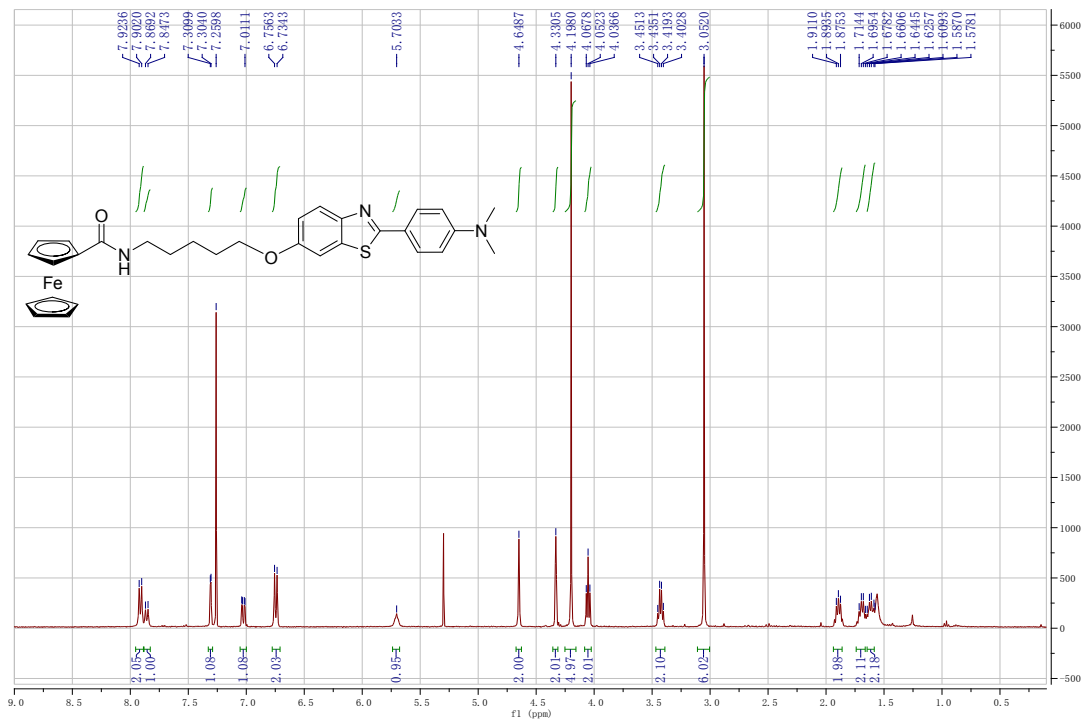

MS for compound 19

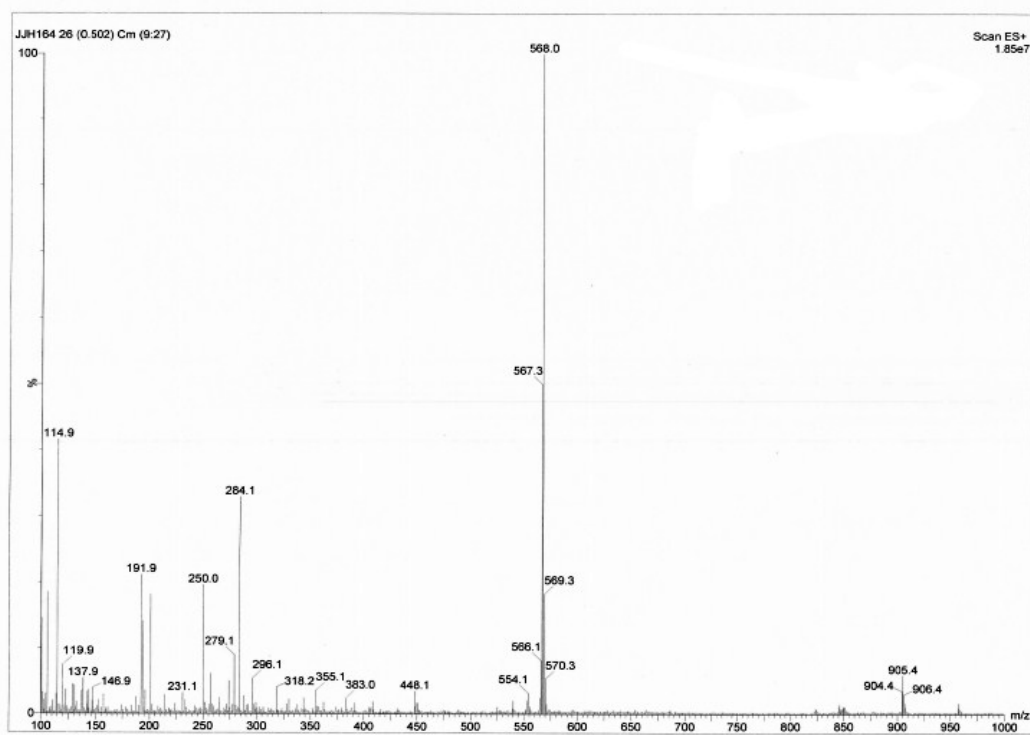

<sup>1</sup>H-NMR for compound 20

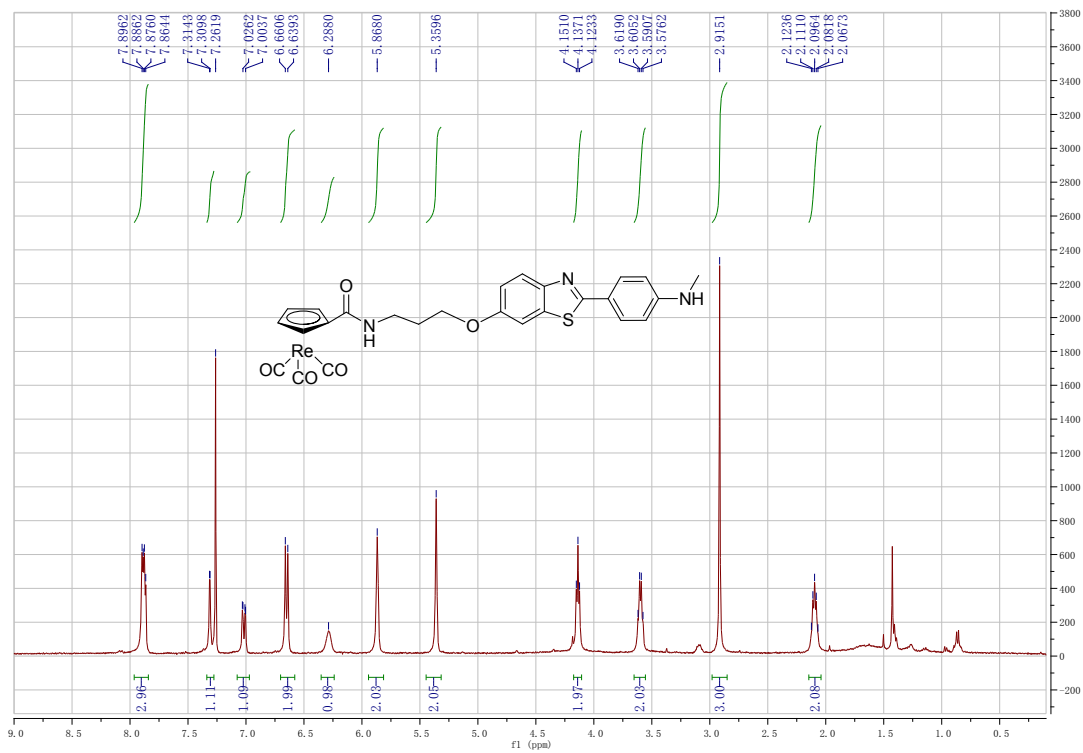

**<sup>13</sup>C-NMR for compound 20**

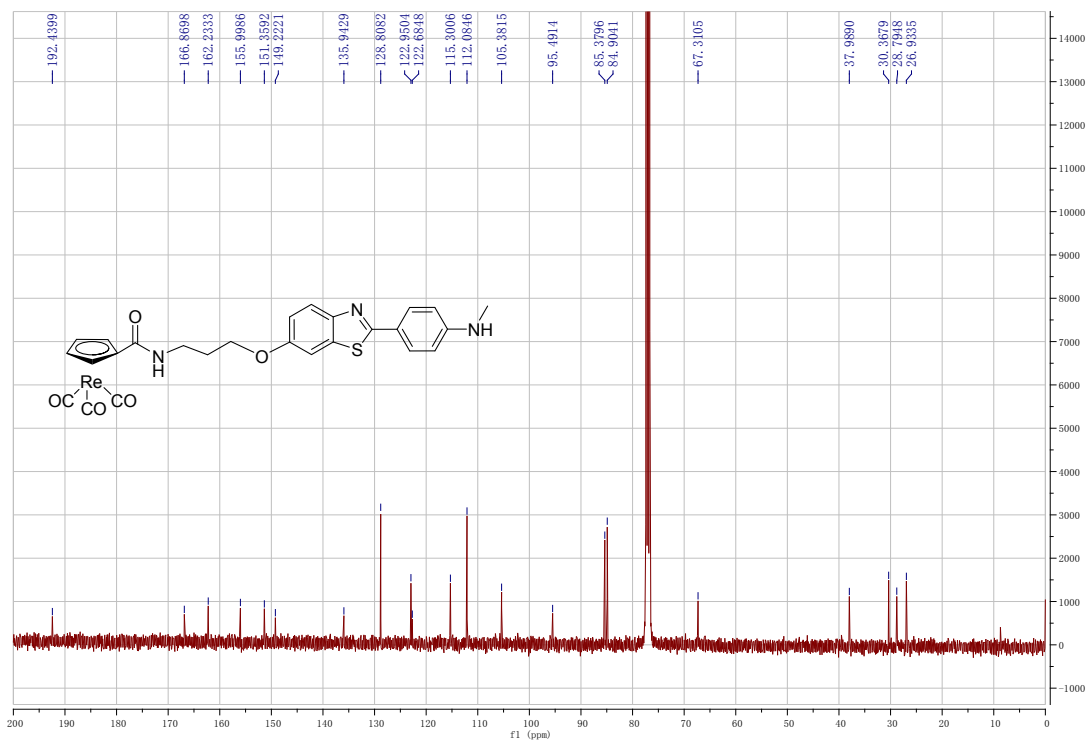

**HRMS for compound 20**

## Elemental Composition Report

Page 1

### Single Mass Analysis

Tolerance = 3.0 PPM / DBE: min = -1.5, max = 50.0  
 Element prediction: Off  
 Number of isotope peaks used for i-FIT = 2

### Monoisotopic Mass, Odd Electron Ions

3731 formula(e) evaluated with 12 results within limits (up to 50 closest results for each mass)

### Elements Used:

C: 0-45 H: 0-70 N: 0-10 O: 0-10 S: 0-2 185Re: 0-1

JJH 179 6 (0.111)  
 TOF MS ES+

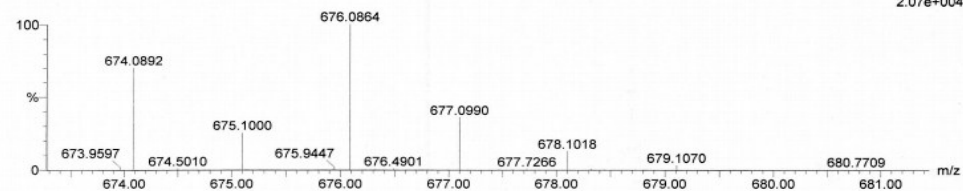

Minimum:  
 Maximum:

| Mass     | Calc. Mass | mDa  | PPM  | DBE  | i-FIT | Formula                 |
|----------|------------|------|------|------|-------|-------------------------|
| 674.0892 | 674.0894   | -0.2 | -0.3 | 29.0 | 4.9   | C30 H14 N10 O10         |
|          | 674.0890   | 0.2  | 0.3  | 23.0 | 6.0   | C30 H22 N6 O9 S2        |
|          | 674.0895   | -0.3 | -0.4 | 13.0 | 160.0 | C19 H23 N9 O3 S2 185Re  |
|          | 674.0895   | -0.3 | -0.4 | 26.0 | 9.8   | C34 H19 N O3 185Re      |
|          | 674.0888   | 0.4  | 0.6  | 17.0 | 39.0  | C26 H23 N3 O5 S 185Re ✓ |
|          | 674.0896   | -0.4 | -0.6 | 32.0 | 102.4 | C38 H18 N4 O7 S         |
|          | 674.0886   | 0.6  | 0.9  | 14.0 | 262.7 | C18 H19 N9 O8 185Re     |
|          | 674.0882   | 1.0  | 1.5  | 8.0  | 254.5 | C18 H27 N5 O7 S2 185Re  |
|          | 674.0902   | -1.0 | -1.5 | 22.0 | 11.0  | C27 H19 N7 O S 185Re    |
|          | 674.0903   | -1.1 | -1.6 | 28.0 | 23.8  | C31 H18 N10 O5 S2       |
|          | 674.0876   | 1.6  | 2.4  | 42.0 | 226.1 | C42 H10 N8 O3           |
|          | 674.0910   | -1.8 | -2.7 | 37.0 | 157.2 | C39 H14 N8 O3 S         |

## <sup>1</sup>H-NMR for compound 21

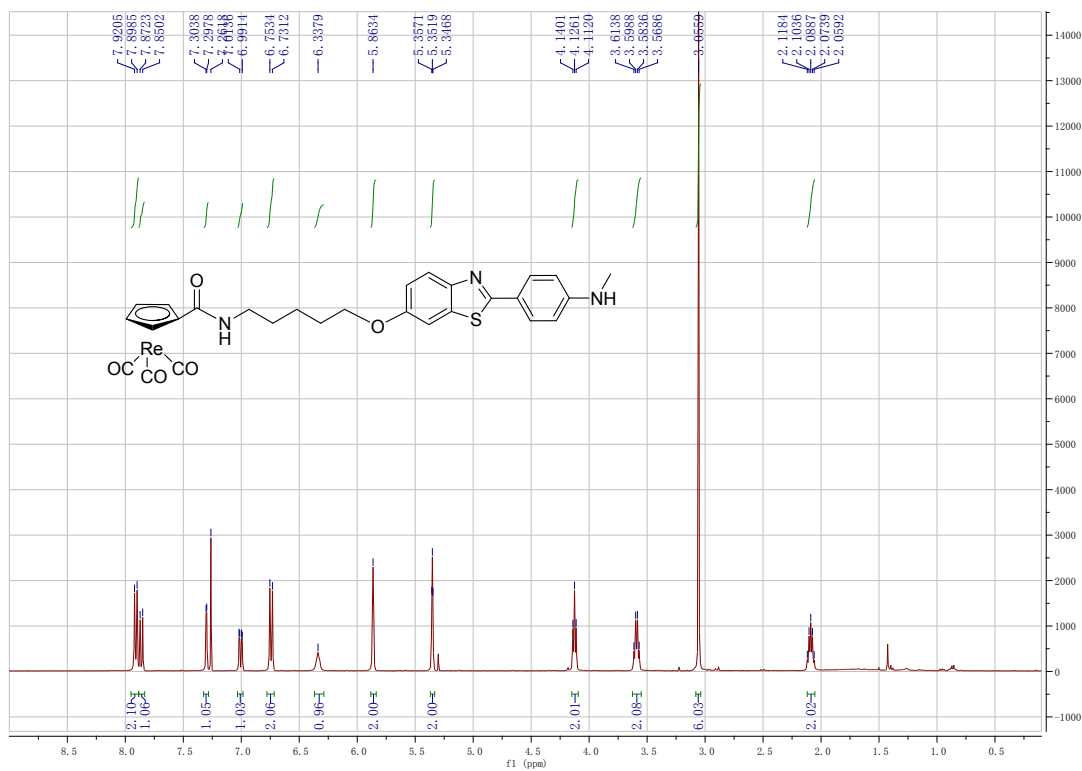

## <sup>13</sup>C-NMR for compound 21



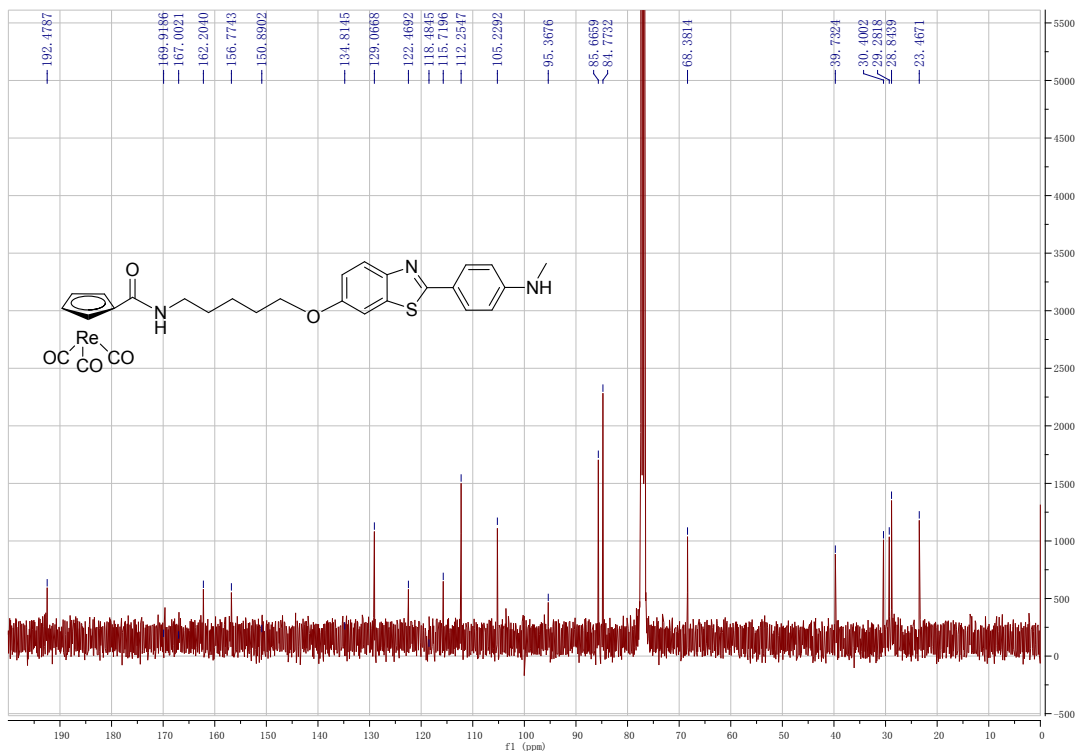

## HRMS for compound 21

### Elemental Composition Report

Page 1

#### Single Mass Analysis

Tolerance = 3.0 PPM / DBE: min = -1.5, max = 50.0  
 Element prediction: Off  
 Number of isotope peaks used for i-FIT = 2

#### Monoisotopic Mass, Odd Electron Ions

3646 formula(e) evaluated with 14 results within limits (up to 50 closest results for each mass)

#### Elements Used:

C: 0-45 H: 0-70 N: 0-10 O: 0-10 S: 0-2 185Re: 0-1

JJH 177 32 (0.592)

TOF MS ES+

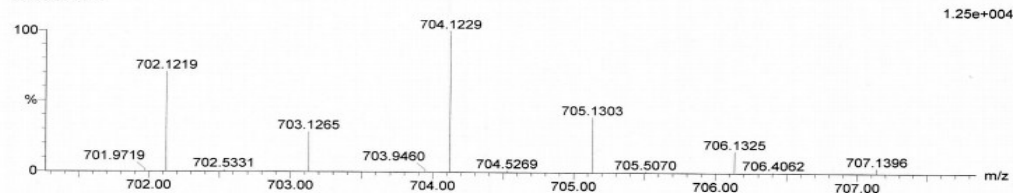

Minimum: -1.5  
 Maximum: 5.0 3.0 50.0

| Mass     | Calc. Mass | mDa  | PPM  | DBE  | i-FIT | Formula                 |
|----------|------------|------|------|------|-------|-------------------------|
| 702.1219 | 702.1216   | 0.3  | 0.4  | 28.0 | 5.8   | C33 H22 N10 O5 S2       |
|          | 702.1215   | 0.4  | 0.6  | 22.0 | 11.9  | C29 H23 N7 O S 185Re    |
|          | 702.1223   | -0.4 | -0.6 | 37.0 | 67.8  | C41 H18 N8 O3 S         |
|          | 702.1226   | -0.7 | -1.0 | 13.0 | 114.7 | C24 H27 N3 O10 185Re    |
|          | 702.1209   | 1.0  | 1.4  | 32.0 | 41.1  | C40 H22 N4 O7 S         |
|          | 702.1208   | 1.1  | 1.6  | 26.0 | 1.1   | C36 H23 N O3 185Re      |
|          | 702.1208   | 1.1  | 1.6  | 13.0 | 110.9 | C21 H27 N9 O3 S2 185Re  |
|          | 702.1207   | 1.2  | 1.7  | 29.0 | 0.2   | C32 H18 N10 O10         |
|          | 702.1233   | -1.4 | -2.0 | 9.0  | 249.9 | C17 H27 N9 O8 S 185Re   |
|          | 702.1203   | 1.6  | 2.3  | 23.0 | 0.4   | C32 H26 N6 O9 S2        |
|          | 702.1235   | -1.6 | -2.3 | 12.0 | 66.2  | C25 H31 N3 O5 S2 185Re  |
|          | 702.1201   | 1.8  | 2.6  | 17.0 | 32.7  | C28 H27 N3 O5 S 185Re ✓ |
|          | 702.1199   | 2.0  | 2.8  | 14.0 | 174.0 | C20 H23 N9 O8 185Re     |
|          | 702.1240   | -2.1 | -3.0 | 18.0 | 69.3  | C25 H23 N7 O6 185Re     |

## <sup>1</sup>H-NMR for compound 22

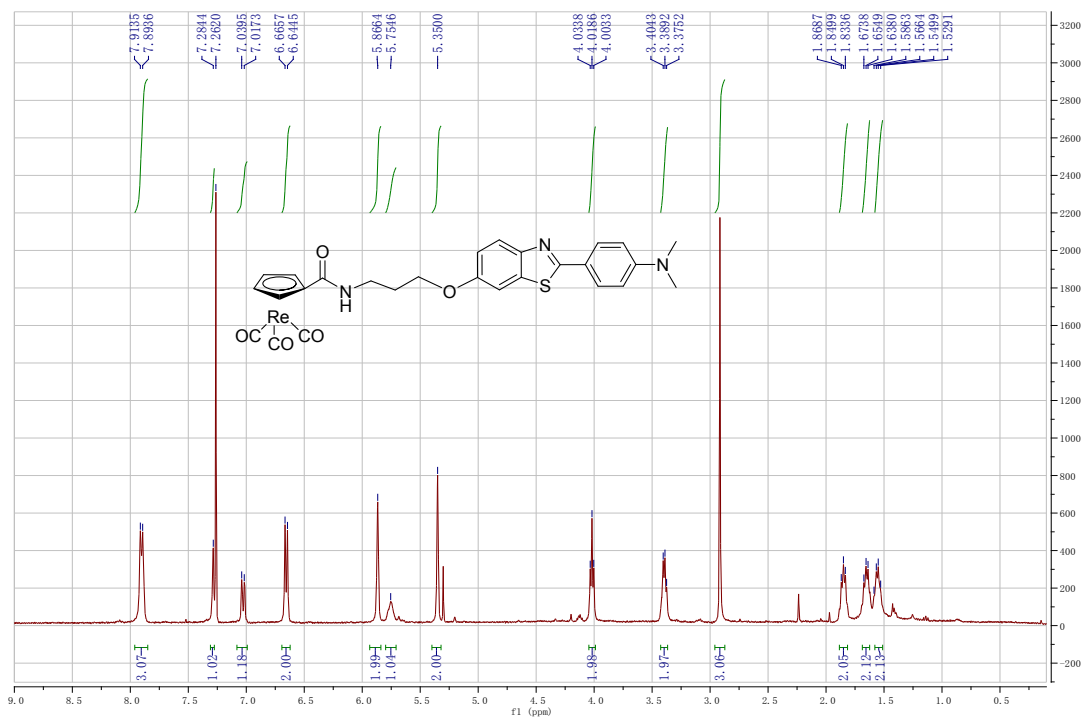

### <sup>13</sup>C-NMR for compound 22

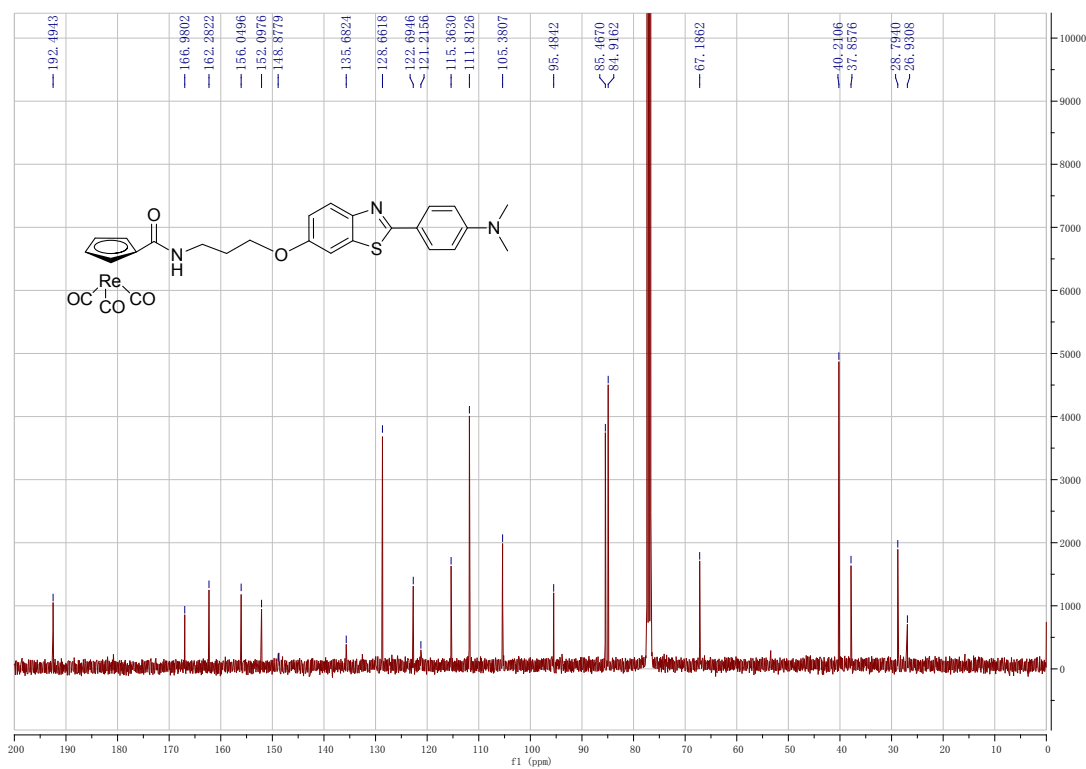

### HRMS for compound 22

Elemental Composition Report

Single Mass Analysis

Tolerance = 3.0 PPM / DBE: min = -1.5, max = 50.0  
 Element prediction: Off  
 Number of isotope peaks used for i-FIT = 2

Monoisotopic Mass, Odd Electron Ions  
 3701 formula(e) evaluated with 13 results within limits (up to 50 closest results for each mass)  
 Elements Used:

C: 0-45 H: 0-70 N: 0-10 O: 0-10 S: 0-2 185Re: 0-1

JJH 176 8 (0.148)  
 TOF MS ES+

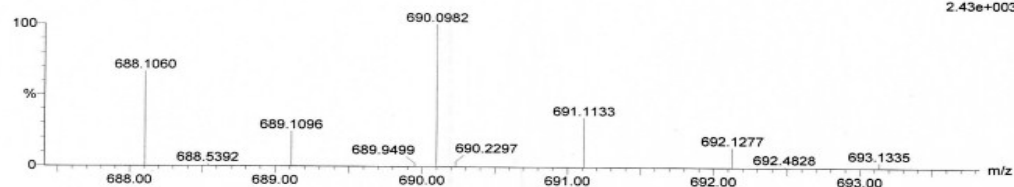

| Mass     | Calc. Mass | mDa  | PPM  | DBE  | i-FIT | Formula                 |
|----------|------------|------|------|------|-------|-------------------------|
| 688.1060 | 688.1060   | 0.0  | 0.0  | 28.0 | 3.8   | C32 H20 N10 O5 S2       |
| 688.1058 | 688.1058   | 0.2  | 0.3  | 22.0 | 0.4   | C28 H21 N7 O S 185Re    |
| 688.1066 | 688.1066   | -0.6 | -0.9 | 37.0 | 20.3  | C40 H16 N8 O3 S         |
| 688.1053 | 688.1053   | 0.7  | 1.0  | 32.0 | 13.8  | C39 H20 N4 O7 S         |
| 688.1052 | 688.1052   | 0.8  | 1.2  | 13.0 | 13.9  | C20 H25 N9 O3 S2 185Re  |
| 688.1051 | 688.1051   | 0.9  | 1.3  | 26.0 | 1.8   | C35 H21 N O3 185Re      |
| 688.1051 | 688.1051   | 0.9  | 1.3  | 29.0 | 1.0   | C31 H16 N10 O10         |
| 688.1070 | 688.1070   | -1.0 | -1.5 | 13.0 | 14.5  | C23 H25 N3 O10 185Re    |
| 688.1046 | 688.1046   | 1.4  | 2.0  | 23.0 | 1.1   | C31 H24 N6 O9 S2        |
| 688.1045 | 688.1045   | 1.5  | 2.2  | 17.0 | 2.5   | C27 H25 N3 O5 S 185Re ✓ |
| 688.1043 | 688.1043   | 1.7  | 2.5  | 14.0 | 24.0  | C19 H21 N9 O8 185Re     |
| 688.1077 | 688.1077   | -1.7 | -2.5 | 9.0  | 36.8  | C16 H25 N9 O8 S 185Re   |
| 688.1078 | 688.1078   | -1.8 | -2.6 | 12.0 | 7.1   | C24 H29 N3 O5 S2 185Re  |

<sup>1</sup>H-NMR for compound 23

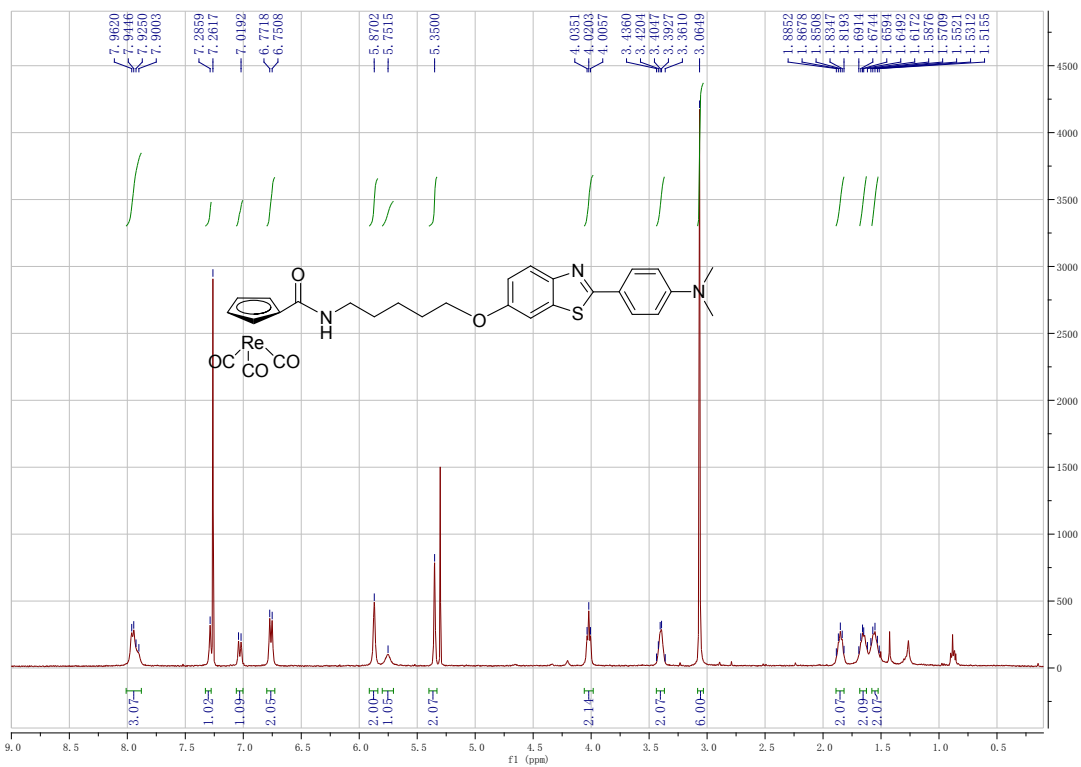

<sup>13</sup>C-NMR for compound 23

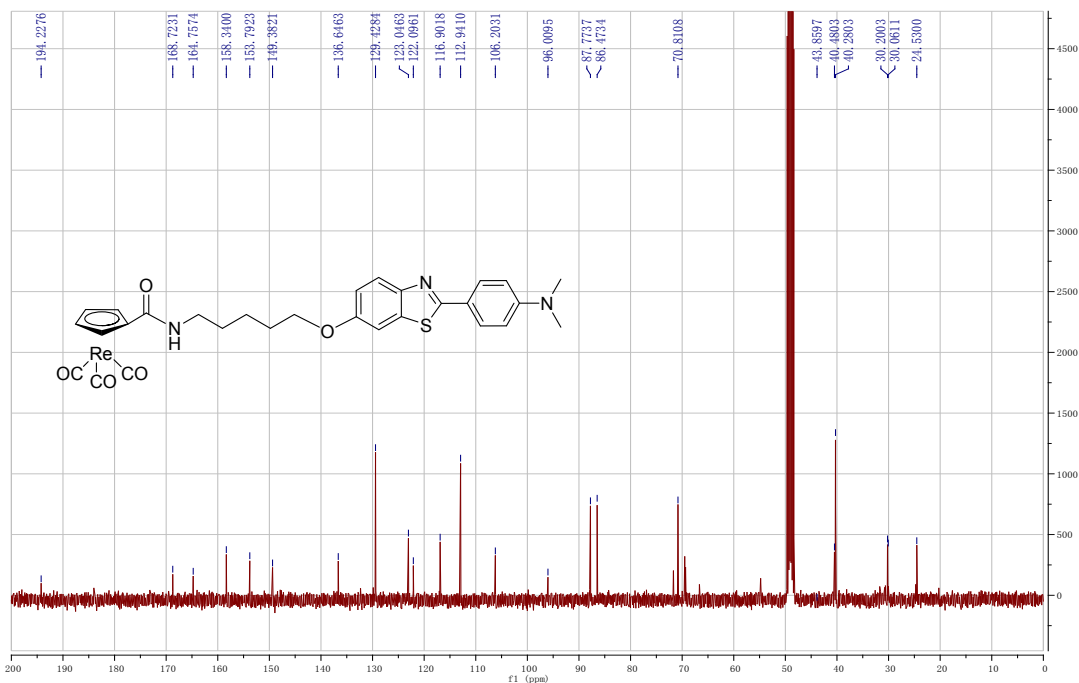

## HRMS for compound 23

### Elemental Composition Report

Page 1

#### Single Mass Analysis

Tolerance = 3.0 PPM / DBE: min = -1.5, max = 50.0

Element prediction: Off

Number of isotope peaks used for i-FIT = 2

Monoisotopic Mass, Odd and Even Electron Ions

3585 formula(e) evaluated with 27 results within limits (up to 50 closest results for each mass)

Elements Used:

C: 0-45 H: 0-70 N: 0-10 O: 0-10 S: 0-2 185Re: 0-1

JJH 173 23 (0.426)

TOF MS ES+

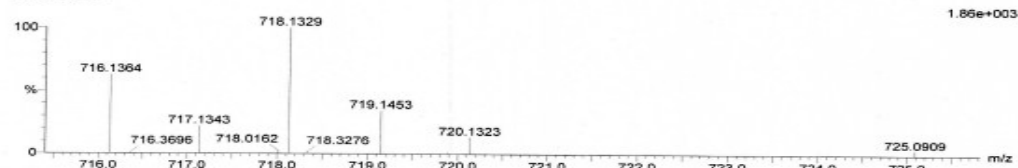

Minimum: 5.0 3.0 -1.5  
Maximum: 50.0 50.0

| Mass     | Calc. Mass | mDa  | PPM  | DBE  | i-FIT | Formula                |
|----------|------------|------|------|------|-------|------------------------|
| 716.1364 | 716.1364   | 0.0  | 0.0  | 29.0 | 3.9   | C33 H20 N10 O10        |
|          | 716.1364   | 0.0  | 0.0  | 26.0 | 5.2   | C37 H25 N O3 185Re     |
|          | 716.1365   | -0.1 | -0.1 | 7.5  | 5.6   | C23 H35 N2 O8 S2 185Re |
|          | 716.1365   | -0.1 | -0.1 | 13.0 | 3.7   | C22 H29 N9 O3 S2 185Re |
|          | 716.1366   | -0.2 | -0.3 | 32.0 | 17.7  | C41 H24 N4 O7 S        |
|          | 716.1359   | 0.5  | 0.7  | 23.0 | 4.2   | C33 H28 N6 O9 S2       |
|          | 716.1369   | -0.5 | -0.7 | 13.5 | 6.0   | C23 H27 N6 O9 185Re    |
|          | 716.1358   | 0.6  | 0.8  | 17.0 | 0.1   | C29 H29 N3 O5 S 185Re  |
|          | 716.1358   | 0.6  | 0.8  | 22.5 | 0.1   | C28 H23 N10 S 185Re    |
|          | 716.1371   | -0.7 | -1.0 | 22.0 | 0.5   | C30 H25 N7 O S 185Re   |
|          | 716.1371   | -0.7 | -1.0 | 16.5 | 0.2   | C31 H31 O6 S 185Re     |
|          | 716.1356   | 0.8  | 1.1  | 14.0 | 8.4   | C21 H25 N9 O8 185Re    |
|          | 716.1373   | -0.9 | -1.3 | 22.5 | 5.9   | C35 H30 N3 O10 S2      |
|          | 716.1373   | -0.9 | -1.3 | 28.0 | 7.7   | C34 H24 N10 O5 S2      |
|          | 716.1352   | 1.2  | 1.7  | 32.5 | 14.9  | C39 H22 N7 O6 S        |
|          | 716.1351   | 1.3  | 1.8  | 8.0  | 8.0   | C21 H33 N5 O7 S2 185Re |
|          | 716.1351   | 1.3  | 1.8  | 26.5 | 3.6   | C35 H23 N4 O2 185Re    |
|          | 716.1378   | -1.4 | -2.0 | 12.5 | 2.3   | C24 H31 N6 O4 S2 185Re |
|          | 716.1379   | -1.5 | -2.1 | 31.5 | 20.6  | C43 H26 N O8 S         |
|          | 716.1379   | -1.5 | -2.1 | 37.0 | 23.6  | C42 H20 N8 O3 S        |
|          | 716.1346   | 1.8  | 2.5  | 23.5 | 2.8   | C31 H26 N9 O8 S2       |
|          | 716.1346   | 1.8  | 2.5  | 20.5 | 3.9   | C35 H31 O S2 185Re     |
|          | 716.1383   | -1.9 | -2.7 | 18.5 | 2.5   | C24 H23 N10 O5 185Re   |
|          | 716.1345   | 1.9  | 2.7  | 42.0 | 30.2  | C45 H16 N8 O3 185Re    |
|          | 716.1383   | -1.9 | -2.7 | 13.0 | 4.0   | C25 H29 N3 O10 185Re   |
|          | 716.1344   | 2.0  | 2.8  | 17.5 | 0.4   | C27 H27 N6 O4 S 185Re  |
|          | 716.1385   | -2.1 | -2.9 | 21.5 | 1.3   | C32 H27 N4 O2 S 185Re  |
